# Supplementary material for: Genetic variation in MYLIP is associated with lipid, thyroid, liver, and hematologic traits in women: evidence from The Trøndelag Health Study and UK Biobank
Source: Research Square preprint supplement (doi:10.21203/rs.3.rs-8427840/v1), 2026-02-09
Supplement: Supplementary file 1 [file 90416ef61a74c804dd1c2950.docx]

**Supplementary materials**

**Supplementary Table 1:** The 10th revision of the international classification of diseases (ICD-10) used for classifying disease outcomes.

| **Disease outcome** | **ICD-10 codes** |
| --- | --- |
| Myocardial infarction | I21.0, I21.01, I21.02, I21.0b, I21.1, I21.11, I21.12, I21.13, I21.2, I21.21, I21.22, I21.3, I21.31, I21.32, I21.4, I21.41, I21.42, I21.4a, I21.9, I21.91, I21.92 |
| Hypertrophic cardiomyopathy | I42.1, I42.2 |
| Coronary artery disease | I20.0,I20.1,I20.8,I20.9,I21.0,I21.01,I21.02,I21.0b,I21.1,I21.11,I21.12,I21.13,I21.2,I21.21,I21.22,I21.3,I21.31,I21.32,I21.4,I21.41,I21.42,I21.4a,I21.9,I21.91,I21.92,I22.0,I22.01,I22.02,I22.1,I22.8,I22.9,I22.91,I22.92,I23.0,I23.1,I23.2,I23.3,I23.4,I23.5,I23.6,I23.8,I24.0,I24.1,I24.8,I24.9,I25.0,I25.1,I25.2,I25.3,I25.4,I25.5,I25.6,I25.8,I25.9 |
| Dilated cardiomyopathy | I42.0 |
| Atrial fibrillation | I48, I48.0, I48.1, I48.2, I48.3, I48.4, I48.9 |
| Heart failure | I50.0, I50.1, I50.9 |
| Stroke | I60.0, I60.1, I60.2, I60.3, I60.4, I60.5, I60.6, I60.7, I60.8, I60.9, I61.0, I61.1, I61.2, I61.3, I61.4, I61.5, I61.6, I61.8, I61.9, I62.0, I62.1, I62.9, I63.0, I63.1, I63.2, I63.3, I63.4, I63.5, I63.6, I63.8, I63.9, I64 |
| Non ischemic stroke | I60.0, I60.1, I60.2, I60.3, I60.4, I60.5, I60.6, I60.7, I60.8, I60.9, I61.0, I61.1, I61.2, I61.3, I61.4, I61.5, I61.6, I61.8, I61.9, I62.0, I62.1, I62.9 |
| Ischemic stroke | I63.0, I63.1, I63.2, I63.3, I63.4, I63.5, I63.6, I63.8, I63.9 |
| Hypertension | I10 |
| CVD | I10,I11.0,I11.9,I12.0,I12.9,I13.0,I13.1,I13.2,I13.9,I15.0,I15.1,I15.2,I15.8,I15.9,I20.0,I20.1,I20.8,I20.9,I21.0,I21.01,I21.02,I21.0b,I21.1,I21.11,I21.12,I21.13,I21.2,I21.21,I21.22,I21.3,I21.31,I21.32,I21.4,I21.41,I21.42,I21.4a,I21.9,I21.91,I21.92,I22.0,I22.01,I22.02,I22.1,I22.8,I22.9,I22.91,I22.92,I23.0,I23.1,I23.2,I23.3,I23.4,I23.5,I23.6,I23.8,I24.0,I24.1,I24.8,I24.9,I25.0,I25.1,I25.2,I25.3,I25.4,I25.5,I25.6,I25.8,I25.9,I26.0,I26.9,I27.0,I27.1,I27.2,I27.8,I27.9,I28.0,I28.1,I28.8,I28.9,I30.0,I30.1,I30.8,I30.9,I31.0,I31.1,I31.2,I31.3,I31.8,I31.9,I32.0,I32.1,I32.8,I33.0,I33.9,I34.0,I34.1,I34.2,I34.8,I34.9,I35.0,I35.1,I35.2,I35.8,I35.9,I36.0,I36.1,I36.2,I36.8,I36.9,I37.0,I37.1,I37.8,I37.9,I38,I39.0,I39.1,I39.2,I39.3,I39.8,I40.0,I40.1,I40.8,I40.9,I41.0,I41.1,I41.2,I41.8,I42.0,I42.1,I42.2,I42.3,I42.4,I42.5,I42.6,I42.7,I42.8,I42.9,I43.0,I43.1,I43.2,I43.8,I44.0,I44.1,I44.2,I44.3,I44.4,I44.5,I44.6,I44.7,I45.0,I45.1,I45.2,I45.3,I45.4,I45.5,I45.6,I45.8,I45.9,I46.0,I46.1,I46.9,I47.0,I47.1,I47.2,I47.9,I48,I48.0,I48.1,I48.2,I48.3,I48.4,I48.9,I49.0,I49.1,I49.2,I49.3,I49.4,I49.5,I49.8,I49.9,I50.0,I50.1,I50.9,I51.0,I51.1,I51.2,I51.3,I51.4,I51.5,I51.6,I51.7,I51.8,I51.9,I52.1,I52.8,I60.0,I60.1,I60.2,I60.3,I60.4,I60.5,I60.6,I60.7,I60.8,I60.9,I61.0,I61.1,I61.2,I61.3,I61.4,I61.5,I61.6,I61.8,I61.9,I62.0,I62.1,I62.9,I63.0,I63.1,I63.2,I63.3,I63.4,I63.5,I63.6,I63.8,I63.9,I64,I65.0,I65.1,I65.2,I65.3,I65.8,I65.9,I66.0,I66.1,I66.2,I66.3,I66.4,I66.8,I66.9,I67.0,I67.1,I67.2,I67.3,I67.4,I67.5,I67.6,I67.7,I67.8,I67.9,I68.0,I68.8,I69.0,I69.1,I69.2,I69.3,I69.4,I69.8,I70.0,I70.00,I70.01,I70.1,I70.10,I70.2,I70.20,I70.21,I70.8,I70.80,I70.81,I70.9,I70.90,I70.91,I71.0,I71.1,I71.2,I71.3,I71.4,I71.5,I71.6,I71.8,I71.9,I72.0,I72.1,I72.2,I72.3,I72.4,I72.5,I72.6,I72.8,I72.9,I73.0,I73.1,I73.8,I73.9,I74.0,I74.1,I74.2,I74.3,I74.4,I74.5,I74.8,I74.9,I77.0,I77.1,I77.2,I77.3,I77.5,I77.6,I77.8,I77.9,I78.0,I78.1,I78.8,I78.9,I79.0,I79.1,I79.2,I79.8,I80.0,I80.1,I80.2,I80.3,I80.8,I80.9,I81,I82.0,I82.1,I82.2,I82.3,I82.8,I82.9,I83.0,I83.1,I83.2,I83.9,I84.0,I84.1,I84.2,I84.3,I84.4,I84.5,I84.6,I84.7,I84.8,I84.9,I85.0,I85.9,I86.0,I86.1,I86.2,I86.3,I86.4,I86.8,I87.0,I87.1,I87.2,I87.8,I87.9,I88.0,I88.1,I88.8,I88.9,I89.0,I89.1,I89.8,I89.9,I95.0,I95.1,I95.2,I95.8,I95.9,I97.0,I97.1,I97.2,I97.8,I97.9,I98.2,I98.3,I98.8,I99 |

**Supplementary Table 2:** The 9th revision of the international classification of diseases (ICD-9) used for classifying disease outcomes in HUNT.

| **Disease outcome** | **ICD-9 codes** |
| --- | --- |
| Myocardial infarction | 410 |
| Hypertrophic cardiomyopathy | 425.1 |
| Coronary artery disease | Sjekk i HUNT-script |
| Dilated cardiomyopathy | 425.4 |
| Atrial fibrillation | 427.3 |
| Heart failure | 428, 428.0, 428.1, 428.9 |
| Stroke | 430, 431, 432, 432.0, 432.1,432.9, 433, 433.0, 433.1, 433.2, 433.3, 433.8, 433.9, 434, 434.0, 434.1, 434.9, 436 |
| Non ischemic stroke | 430, 431, 432, 432.0, 432.1, 432.9 |
| Ischemic stroke | 433, 433.0, 433.1, 433.2, 433.3, 433.8, 433.9, 434, 434.0, 434.1, 434.9 |
| Hypertension | 401, 401.0, 401.1, 401.9 |
| CVD | 401,401.0,401.1,401.2,401.3,401.9,402,402.0,402.1,402.2,402.9,403,403.0,403.1,403.9,404,404.0,404.1,404.9,405,405.0,405.1,405.2,405.3,405.9,410,411,412,413,414,414.0,414.1,414.2,414.8,414.9,415,415.0,415.1,416,416.0,416.1,416.8,416.9,417,417.1,417.9,420,420.0,420.9,421,421.0,421.1,421.9,422,422.0,422.9,423,423.0,423.1,423.2,423.8,423.9,424,424.0,424.1,424.2,424.3,424.4,424.5,424.6,424.9,425,425.0,425.1,425.3,425.4,425.5,425.6,425.7,425.8,425.9,426,426.0,426.1,426.2,426.3,426.4,426.5,426.6,426.7,426.8,426.9,427,427.0,427.1,427.2,427.3,427.4,427.5,427.6,427.8,427.9,428,428.0,428.1,428.9,429,429.0,429.1,429.2,429.3,429.4,429.5,429.6,429.8,429.9,430,431,432,432.0,432.1,432.9,433,433.0,433.1,433.2,433.3,433.8,433.9,434,434.0,434.1,434.9,435,436,437,437.0,437.1,437.2,437.3,437.4,437.8,437.9,438,440,440.0,440.1,440.2,440.8,440.9,441,441.0,441.1,441.2,441.3,441.4,441.5,441.6,442,443,443.0,443.1,443.8,443.9,444,446,446.0,446.1,446.2,446.3,446.4,446.5,446.6,446.7,447,447.0,447.2,447.3,447.6,447.8,447.9,448,451,451.0,451.1,451.2,451.8,451.9,452,453,453.0,453.1,453.2,453.3,453.8,453.9,454,454.0,454.1,454.2,454.9,455,455.0,455.1,455.2,455.3,455.4,455.5,455.6,455.7,455.8,455.9,456,456.0,456.1,456.2,456.4,456.5,456.8,457,457.0,457.1,457.2,457.9,458,458.0,458.1,458.2,458.3,458.9,459,459.0,459.1,459.9 |

**Supplementary Table 3:** Overview of self-reported disease and medication variables from HUNT, including which HUNT survey(s) the data was from and a description of the variables.

| **Variable name** | **HUNT survey** | **Description** |
| --- | --- | --- |
| CarInfEv | NT1BLQ1, NT2BLQ1, NT3BLQ1, NT4BLQ1 | Self-reported myocardial infarction. |
| DiaEv | NT1BLQ1, NT2BLQ1, NT3BLQ1, NT4BLQ1 | Self-reported diabetes. |
| CarAngEv | NT1BLQ1, NT2BLQ1, NT3BLQ1, NT4BLQ1 | Self-reported angina pectoris. |
| ApoplEv | NT1BLQ1, NT2BLQ1, NT3BLQ1, NT4BLQ1 | Self-reported stroke or cerebral haemorrhage. |
| ThyHypoEv | NT2BLQ1, NT3BLQ2, NT4BLQ1 | Self-reported hypothyroidism (too low metabolism). |
| CarFaiEv | NT3BLQ1, NT4BLQ1 | Self-reported heart failure. |
| AstEv | NT2BLQ1, NT3BLQ1, NT4BLQ1 | Self-reported asthma. |
| CaEv | NT2BLQ1, NT3BLQ1, NT4BLQ1 | Self-reported cancer. |
| ThyHypeEv | NT2BLQ1, NT3BLQ2, NT4BLQ1 | Self-reported hyperthyroidism (too high metabolism). |
| MigEv | NT3BLQ2, NT4BLQ1 | Self-reported migraine. |
| HypeGluEv | NT3BLQ1, NT4BLQ1 | Self-reported high blood sugar (hyperglycaemia). |
| CarAtrFibrEv | NT4BLQ1 | Self-reported atrial fibrillation. |
| RenDisEv | NT3BLQ1, NT4BLQ1 | Self-reported kidney disease. |
| RhArthEv | NT2BLQ1, NT3BLQ1, NT4BLQ1 | Self-reported arthritis (rheumatoid arthritis) |
| MentPrEv | NT2BLQ1, NT3BLQ1, NT4BLQ1 | Self-reported mental health problems for which they sought help. |
| SponArthEv | NT2BLQ1, NT3BLQ1, NT4BLQ1 | Self-reported bechterew's disease. |
| COPDEv | NT3BLQ1, NT4BLQ1 | Self-reported chronic bronchitis, emphysema or COPD. |
| EpilEv | NT2BLQ1, NT3BLQ1 | Self-reported epilepsy. |
| OstEv | NT2BLQ1, NT3BLQ1 | Self-reported osteoporosis. |
| FibroEv | NT2BLQ1, NT3BLQ1 | Self-reported fibromyalgia. |
| SarcEv | NT3BLQ1 | Self-reported sarcoidosis |
| CarDisOtEv | NT3BLQ1 | Self-reported other heart disease. |
| DisChr | NT2BLQ1, NT3BLQ1, NT4BLQ1 | Self-reported long-term illness or injury of a physical or psychological nature that impairs functioning in everyday life. |
| MSPaLY | NT2BLQ1, NT3BLQ2, NT4BLQ1 | Self-reported pain and/or stiffness in muscles and limbs that has lasted for at least 3 consecutive months. |
| HaLY | NT2BLQ2, NT3BLQ2, NT4BLQ2 | Self-reported headaches in the last year. |
| BPMedEv | NT1BLQ1, NT2BLQ1, NT3BLQ1, NT4BLQ1 | Self-reported use or previous use of medicine for high blood pressure. |
| CholLoMedCu | NT4BLQ1 | Self-reported use or previous use of medicine cholesterol lowering medication |
| TireCu | NT4BLQ2 | Self-reported feeling of exhaustion/tiredness. |

**Supplementary Table 4:** Overview of female-specific variables from HUNT, including which HUNT survey(s) the data was from and a description of the variables. All are self-reported through questionnaire or interviews.

| **Variable name** | **HUNT survey** | **Description** |
| --- | --- | --- |
| MenarcAg | NT2BLQ1, NT3BLI, NT4BLI | Age at first menstruation. |
| MenopAg | NT2BLQ2, NT2BLI, NT3BLI, NT4BLI | Age at last menstruation. |
| ReprodYrs |  | Menopause age – menarche age. |
| MensCycDu | NT2BLQ2, NT3BLI, NT4BLI | Normal interval between periods, from the first day in one period to the first day in the next period. |
| PregN | NT2BLQ2, NT3BLQ2 | Number of times pregnant. |
| DelivN | NT2BLQ1, NT2BLQ2, NT3BLI, NT4BLI | Number of children. |
| MensNev | NT2BLQ1, NT3BLI | Have never menstruated. |
| MensRegLY | NT2BLQ2, NT3BLI, NT4BLI | Regular periods. |
| MensPa | NT4BLI | Pain related to menstruation or other vaginal bleeding. |
| AmenEv | NT2BLQ2, NT3BLI | Amenorrhoea, defined as not gotten a period for at least 6 months (pre-menopause), not including during pregnancy or post-natal period |
| BCPilEv | NT2BLQ2, NT3BLQ2, NT4BLQ2 | Use of birth control pills. |
| EstrSys | NT2BLQ2, NT3BLQ2, NT4BLQ2 | Use of medicines containing estrogen (tablets or patches). |
| PregDiffMor1Y | NT2BLQ2, NT3BLQ2, NT4BLQ2 | Tried for more than a year to become pregnant. |
| IVFerEv | NT3BLQ2, NT4BLQ2 | Received hormone treatment to become pregnant. |
| PregEv | NT3BLI, NT4BLI | Ever been pregnant. |
| MenopSym | NT3BLQ2, NT4BLQ2 | Hot flashes due to menopause. |

**Supplementary Table 5:** Overview of baseline measurements from HUNT, including which HUNT survey(s) the data was from and a description of the variables. When data from more than one survey was available for a participant, we used the earliest available measurement.

| **Variable name** | **HUNT survey** | **Description** |
| --- | --- | --- |
| Wei | NT1BLM, NT2BLM, NT3BLM, NT4BLM | Weight measurement (kg). |
| Hei | NT1BLM, NT2BLM, NT3BLM, NT4BLM | Height measurement (cm). |
| BMI | NT1BLM, NT2BLM, NT3BLM, NT4BLM | Body mass index measurement. |
| Puls | NT1BLM, NT2BLM, NT3BLM, NT4BLM | Pulse measurement (bpm), mean of measurement 2 and 3 at one survey. |
| BPDias | NT1BLM, NT2BLM, NT3BLM, NT4BLM | Diastolic blood pressure measurement (mmHg), mean of measurement 2 and 3 at one survey. |
| BPSyst | NT1BLM, NT2BLM, NT3BLM, NT4BLM | Systolic blood pressure measurement (mmHg), mean of measurement 2 and 3 at one time point. |
| GluNonFast | NT1BLM, NT2BLM, NT3BLM | Non-fasting blood glucose measurement (mmol/L). |
| WaistCirc | NT2BLM, NT3BLM, NT4BLM | Waist circumference measurement (cm). |
| HipCirc | NT2BLM, NT3BLM, NT4BLM | Hip circumference measurement (cm). |
| ArmCirc | NT2BLM, NT3BLM, NT4BLM | Arm circumference measurement (cm). |
| BPMap | NT2BLM, NT3BLM, NT4BLM | Mean arterial pressure measurement (mmHg), mean of all measurement at one time point. |
| SeChol | NT2BLM, NT3BLM, NT4BLM | Serum cholesterol (mmol/L) |
| SeTrig | NT2BLM, NT3BLM, NT4BLM | Serum triglyceride (mmol/L) |
| SeCrea | NT2BLM, NT3BLM, NT4BLM | Serum Creatinine (µmol/L) |
| GFRE | NT2BLM, NT4BLM | Estimated glomerular filtration rate (ml/min/1.73 m²) |
| SeGADAb | NT2BLM, NT3BLM | Anti-GAD (Glutamic acid decarboxylase) (ai) |
| SeCRP_ | NT3BLM, NT4BLM | C-reactive protein (µg/ml) |
| SeTSH | NT3BLM, NT4BLM | Thyroid-Stimulating Hormone (TSH) (mIU/L) |
| SeTPOAb | NT3BLM, NT4BLM | Anti-TPO (IU/mL) |
| SeVitAAn2 | NT2BLM | Vitamin A (retinol) (µM) |
| SeVitD2An2 | NT2BLM | Vitamin D (25-hydroxyvitamin D2) (nM) |
| SeVitDTotCorr | NT2BLM | Serum vitamin D total corrected (nmol/L) |
| SeVitD3An2 | NT2BLM | Vitamin D (25-hydroxyvitamin D3) (nM) |
| SeVitEAn2 | NT2BLM | Vitamin E (alpha-tocopherol) (µM) |
| SeVitKAn2 | NT2BLM | Vitamin K1 (phylloquinone) (ng/ml) |
| SeChrom_ | NT2BLM | Chromogranin (nmol/L) |
| GFREstStag | NT2BLM | Estimated glomerular filtration rate stage |
| BloHbA1c | NT2BLM | Blood Heamoglobin A1c (mmol/mol) |
| SeTIBC | NT2BLM | Total iron binding capacity (µmol/L) |
| SeTransfP | NT2BLM | Transferrin saturation percentage |
| SeCEFe | NT2BLM |  |
| SeGT | NT3BLM | Serum GT (Gamma glutamyl transferase) (U/l) |
| SeLDH | NT3BLM | Serum Lactate Dehydrogenase (U/l) |
| SeASAT | NT3BLM | Serum ASAT (Aspartate aminotransferase) (U/l) |
| SeUrea | NT3BLM | Urea in serum |
| SeT4 | NT3BLM | Free thyroxin (T4) (pmol/L) |
| SePhos_ | NT3BLM | Serum Phosphate (mmol/l) |
| SeALAT | NT3BLM | Serum alanine aminotransferase (ALAT) (U/l) |
| SeALP | NT3BLM | Serum ALP (Alkaline phosphotase) (U/l) |
| SeCECa | NT3BLM |  |
| BIAPro | NT4BLM | Protein relative to weight |
| BIABfm | NT4BLM | Amount of body fat |
| BIASlm_ | NT4BLM | Body weight minus fat mass |
| BIAFfm | NT4BLM | Body weight minus fat mass (Amount of fat free mass) |
| BIASmm | NT4BLM | Amount of skeletal muscle mass |
| BIAPbf | NT4BLM | Percent body fat |
| BIAWaistHipR | NT4BLM | Waist/hip ratio |
| BIAVfl | NT4BLM | Level of visceral fat |
| BIAVfa | NT4BLM | Area of viscera fat |
| BIACircArmRi | NT4BLM | Calculated circumference right arm |
| BIACircArmLe_ | NT4BLM | Calculated circumference left arm |
| BloHb | NT4BLM | Haemoglobin (g/dl) |
| BloPlate | NT4BLM | Thrombocytes (platelets) count (10^9/L) |
| BloWbc | NT4BLM | Leukocytes (white blood cells) count (10^9/L) |
| BloNeutN | NT4BLM | Neutrophils count; absolute value (10^9/L) |
| BloNeutP | NT4BLM | Neutrophils count; percent |
| BloEosN | NT4BLM | Eosinophil count, absolute value (10^9/L) |
| BloEosP | NT4BLM | Eosinophil count, percent |
| SeTnI | NT4BLM | Serum high sensitive Troponin I (ng/L) |
| BloHbA1cNGSP | NT4BLM | Blood Heamoglobin A1c (%) |
| BloHbA1cIFCC | NT4BLM | Blood Heamoglobin A1c (mmol/mol) |
| BloPeth | NT4BLM | Phosphatidyl ethanol (µM) |
| BloEry | NT4BLM | Red Blood Cells, erythrocytes count |
| BloMCH | NT4BLM | Mean Cell Hemoglobin (pg) |
| BloRDWSd | NT4BLM | Red cell Distribution Width - standard deviation (fL) |
| BloRDWCV | NT4BLM | Red cell Distribution Width - coefficient of variation |
| BloPDW | NT4BLM | Platelet Distribution Width (fL) |
| BloMPV_ | NT4BLM | Mean Platelet Volume (fL) |
| BloNRbc | NT4BLM | Nucleated Red Blood Cells (10^9/L) |
| BloNRbcP | NT4BLM | Nucleated Red Blood Cells; percent |
| BloLymN | NT4BLM | Lymphocytes count; absolute value (10^9/L) |
| BloMonN | NT4BLM | Monocytes count; percent |
| BloBasoN | NT4BLM | Basophils count, absolute value (10^9/L) |
| BloLymP | NT4BLM | Lymphocytes count; percent |
| BloMonP | NT4BLM | Monocytes count; percent |
| BloBasoP | NT4BLM | Basophils count; percent |
| BloIG | NT4BLM | Immature granulocytes count, absolute value (10^9/L) |
| BloIGP | NT4BLM | Immature granulocytes count; percent |
| SeHemo | NT4BLM | Hemolysis index |
| ActDyAve | NT4BLM | Mean active time per day (s) |
| SeAlb | NT4BLM | Serum albumin (µmol/L) |
| SpO2Mn23 | NT4BLM |  |
| SeLipe | NT4BLM | Lipemia index |
| SeIct | NT4BLM | Icterus index |
| SeHDLChol | NT2BLM, NT3BLM, NT4BLM | HDL-cholesterol in serum (mmol/L) |
| EstimatedLDLChol | NT2BLM, NT3BLM, NT4BLM | Total cholesterol - HDL cholesterol – (triglycerides/5). |

Supplementary Methods

Running SAIGE in UKB, we first constructed a sparse genetic relationship matrix (GRM; SAIGE step 0) using 5,000 randomly selected markers and a relatedness cutoff of 0.05, as recommended for UK Biobank data. For fitting the logistic mixed model (SAIGE step 1), we generated a new PLINK file containing 2,000 randomly selected markers, following the SAIGE documentation. For each disease outcome, we fit the logistic mixed model (step 1) and subsequently performed the gene-based tests (step 2). In step 2, we specified loco = FALSE to ensure that the sparse GRM created in step 0 was used.

UK Biobank

| **Disease outcome** | **ICD-10 codes** |
| --- | --- |
| Myocardial infarction | I21 |
| Hypertrophic cardiomyopathy | I42.1, I42.2 |
| Dilated cardiomyopathy | I42.0 |
| Atrial fibrillation | I48 |
| Heart failure | I50 |
| Stroke | I60, I61, I62, I63, I64 |
| Non ischemic stroke | I60, I61, I62 |
| Ischemic stroke | I63 |
| Hypertension | I10 |
| CVD | I10-I15, I20-I25, I26_I28, I30-I52, I60-I69, I70-I79, I80-I89, I95-I99 |
