# Supplementary material for: Genetic variation in MYLIP is associated with lipid, thyroid, liver, and hematologic traits in women: evidence from The Trøndelag Health Study and UK Biobank
Source: Research Square preprint supplement (doi:10.21203/rs.3.rs-8427840/v1), 2026-02-09
Supplement: Supplementary file 2 [file ae95ce9374b2c003204c7c53.xlsx]

## Sheet: Sheet1
Supplemenatary Table 1: Top five most significant SNPs per disease outcomes in HUNT, including validation in UKB
POS (37)	Allele1	Allele2	AC_Allele2	AF_Allele2	BETA HUNT	SE HUNT	p-val	N_case HUNT	N_ctrl HUNT	phenotype	POS (38)	A1_freq UKB	BETA UKB	p-val UKB
16198268	C	T	1475.5	0.0160133	-0.300929	0.10182	0.003121636	4525	41546	AF	16198037	0.01625404	0.026717	0.6050973
16180958	T	C	4062.3	0.0440874	-0.180299	0.0612814	0.003259454	4525	41546	AF	16180727	0.03637432	0.021903	0.5305571
16196187	G	C	1132.85	0.0122946	-0.344558	0.117185	0.003279106	4525	41546	AF	16195956	0.008860627	-0.0062357	0.9297467
16180990	G	A	3956.6	0.0429402	-0.181058	0.0622865	0.00365084	4525	41546	AF	16180759	0.03605192	0.02055717	0.5576667
16193171	C	T	1472	0.0159753	-0.293366	0.101181	0.003738434	4525	41546	AF	16192940	0.01578105	0.01847504	0.7248451
16196323	A	C	31.55	0.0003424	1.794290	0.5995150	0.002763391	5491	40580	CAD	16196092	0.0006131	0.2385205	0.3173292
16181681	A	G	831.40	0.0090230	-0.398311	0.1331230	0.002771105	5491	40580	CAD	16181450	0.00951788	-0.1403797	0.01976186
16197377	G	A	4453.85	0.0483368	0.171295	0.0628913	0.006456257	5491	40580	CAD	16197146	0.07249908	-0.004610804	0.8415146
16144515	A	T	69.95	0.00075915	1.107110	0.4165490	0.007864891	5491	40580	CAD	16144284	0.002042807	-0.1950302	0.1337472
16181676	A	G	115.80	0.00125676	-1.129890	0.4278920	0.008276063	5491	40580	CAD	16181445	0.00028458	0.02036401	0.9579889
16157864	A	G	969.95	0.0105267	-0.193928	0.0801684	0.01556279	21889	24182	CVD	16157633	0.009720499	0.03837334	0.2481165
16096128	C	T	1071.55	0.0116293	-0.163839	0.0771925	0.03379772	21889	24182	CVD	16095897	0.009720499	0.03837334	0.2481165
16167267	G	A	1424.55	0.0154604	0.138656	0.0686381	0.04337209	21889	24182	CVD	16167036	0.0199244	-0.01154594	0.6212829
16098909	T	A	996.2	0.0108116	0.16855	0.084859	0.0470066	21889	24182	CVD	16098678	0.0125419	0.02838159	0.3392315
16124872	C	T	1336.15	0.014501	-0.137143	0.0692273	0.04758548	21889	24182	CVD	16124641	0.01424787	0.01302319	0.636143
16090103	T	A	48067.5	0.521668	-0.331991	0.114385	0.003703181	172	45899	DCM	16089872	0.5176616	0.0906575	0.2114815
16189921	C	A	25934	0.281457	-0.323077	0.120372	0.007274795	172	45899	DCM	16189690	0.257508	0.1069457	0.1844129
16187335	A	C	25930.1	0.281415	-0.322958	0.120383	0.007301942	172	45899	DCM	16187104	0.2574029	0.1075661	0.1819292
16192759	C	G	25930.8	0.281423	-0.322929	0.120375	0.007303353	172	45899	DCM	16192528	0.25748	0.1073107	0.1828967
16190511	T	C	24451.9	0.265372	-0.327967	0.122363	0.007355968	172	45899	DCM	16190280	0.2411453	0.1134418	0.1680748
16177057	C	T	10008.9	0.108625	0.515486	0.154316	0.0008363796	232	45839	HCM	16176826	0.09327854	-0.0838761	0.6336082
16110814	A	C	4467.6	0.048486	0.603971	0.231613	0.009115871	232	45839	HCM	16110583	0.05611052	-0.1477928	0.506968
16171206	A	C	5945.95	0.0645303	0.490186	0.196657	0.0126814	232	45839	HCM	16170975	0.0575679	-0.1239163	0.5765326
16084400	C	G	2246.15	0.024377	-0.75216	0.313242	0.016341	232	45839	HCM	16084169	0.02399937	-0.08021641	0.8099444
16180990	G	A	3956.6	0.0429402	0.495148	0.228095	0.02994645	232	45839	HCM	16180759	0.03605192	-0.02256802	0.9335026
16157108	G	A	6.55	7.10859e-05	6.47362	2.3575	0.006033262	3472	42599	HF	16156877	0.0003029257	-0.4887322	0.4353621
16159087	C	A	72.95	0.000791713	1.35339	0.494044	0.006155132	3472	42599	HF	16158856	NA	NA	NA
16079643	T	A	13.25	0.0001438	3.94745	1.4693	0.007218144	3472	42599	HF	16079412	0.0002561332	-0.5121836	0.4084081
16146436	G	A	1.9	2.06203e-05	12.8303	5.00716	0.01039519	3472	42599	HF	16146205	NA	NA	NA
16181905	T	A	222.65	0.00241638	0.719404	0.297413	0.01556858	3472	42599	HF	16181674	0.00461103	-0.09146169	0.509159
16125943	A	G	2822.25	0.0306294	0.111557	0.0577109	0.05323194	10706	35365	hypertension	16125712	0.02143291	-0.03534828	0.1627363
16098909	T	A	996.2	0.0108116	0.177001	0.097631	0.06983752	10706	35365	hypertension	16098678	0.0125419	0.06173182	0.059642
16086322	C	T	7118.55	0.0772563	-0.060337	0.0350863	0.08549183	10706	35365	hypertension	16086091	0.07368679	-0.01389142	0.3062783
16146435	C	T	2527.3	0.0274283	0.0963335	0.0563806	0.08751971	10706	35365	hypertension	16146204	0.02294945	0.02629551	0.2688162
16124872	C	T	1336.15	0.014501	-0.130944	0.0797753	0.1007124	10706	35365	hypertension	16124641	0.01424787	0.0656568	0.03051473
16191154	G	T	5029.3	0.0545821	-0.244618	0.104251	0.01895452	2599	43472	MI	16190923	NA	NA	NA
16197377	G	A	4453.85	0.0483368	0.19082	0.0832665	0.02192394	2599	43472	MI	16197146	0.07249908	-0.001095125	0.9810912
16080883	A	C	78195.8	0.848644	-0.0908709	0.0435704	0.03701386	2599	43472	MI	16080652	0.8273522	-0.006042887	0.8431952
16082087	T	G	78228.2	0.848996	-0.0908845	0.0436099	0.03715688	2599	43472	MI	16081856	0.827024	-0.007239227	0.8125183
16081054	A	G	78197.3	0.848661	-0.0907834	0.0435699	0.037194	2599	43472	MI	16080823	0.827231	-0.006131989	0.8408474
16133986	C	T	1169	0.0126869	-0.275652	0.133191	0.03848969	2909	43162	istroke	16133755	0.01469514	-0.04123115	0.692678
16188956	C	T	2211.4	0.0239999	-0.190114	0.0968557	0.04966278	2909	43162	istroke	16188725	0.01836514	0.1344661	0.1514255
16120819	C	T	20527	0.222776	0.068536	0.0352599	0.0519269	2909	43162	istroke	16120588	0.2041796	-0.01498024	0.627974
16122360	C	G	20767.4	0.225384	0.0662209	0.0350681	0.05897846	2909	43162	istroke	16122129	0.2046132	-0.01927783	0.5312648
16175230	G	C	1369.85	0.0148667	-0.222793	0.120728	0.06497725	2909	43162	istroke	16174999	0.01425748	0.1639111	0.1224134
16093599	G	A	1375.65	0.0149297	-0.528599	0.218126	0.01537761	775	45296	nistroke	16093368	0.01023248	0.1450643	0.3934608
16194284	T	C	16700.8	0.181251	-0.158004	0.0679913	0.0201312	775	45296	nistroke	16194053	0.1674119	-0.07591274	0.09456555
16190386	G	A	16691.8	0.181154	-0.157868	0.0680581	0.02036195	775	45296	nistroke	16190155	0.1680008	-0.07719843	0.08774121
16158970	G	A	4011.15	0.0435323	0.2965	0.130468	0.02305139	775	45296	nistroke	16158739	0.04147441	-0.1156807	0.1760506
16184733	C	G	16119.9	0.174946	-0.151828	0.0689281	0.02761548	775	45296	nistroke	16184502	0.1633788	-0.07899075	0.08507678
16087234	G	A	78216	0.848864	-0.0980347	0.0374469	0.008845585	3639	42432	stroke	16184502	0.1633788	-0.03316826	0.216308
16088106	T	G	77907.5	0.845515	-0.0968815	0.0370631	0.008949829	3639	42432	stroke	16184502	0.1633788	-0.03316826	0.216308
16188956	C	T	2211.4	0.0239999	-0.230355	0.0885408	0.009276894	3639	42432	stroke	16188725	0.01836514	0.1128332	0.1307385
16082087	T	G	78228.2	0.848996	-0.0955347	0.0374643	0.0107716	3639	42432	stroke	16081856	0.827024	-0.00567188	0.8298516
16082947	T	C	78225.2	0.848963	-0.0954752	0.037461	0.01081392	3639	42432	stroke	16082716	0.8268952	-0.005077582	0.8473878
16083700	T	C	503.10	0.00563445	1.085870	0.2783400	9.569795e-05	1684	42961	Self rep Hyperthyroidism	16083469	0.008730341	0.0717352	0.6316631
16198367	G	A	1976.35	0.02213410	0.512569	0.1488920	5.762438e-04	1684	42961	Self rep Hyperthyroidism	16198136	0.03681904	0.02793397	0.7134903
16089487	A	G	78608.00	0.88036700	0.175046	0.0570336	2.146512e-03	1684	42961	Self rep Hyperthyroidism	16089256	0.8487925	-0.01991788	0.6095675
16137589	G	A	396.85	0.00444451	0.771186	0.2915990	8.176927e-03	1684	42961	Self rep Hyperthyroidism	16137358	0.003597729	-0.213742	0.3485787
16107083	G	C	975.10	0.01092060	-0.518120	0.1972070	8.606858e-03	1684	42961	Self rep Hyperthyroidism	16106852	0.01395105	-0.1396351	0.2487296
16157169	C	T	33.45	0.000374161	2.065160	0.614090	0.0007710965	4421	40279	Self-rep Hypothyroidism	16156938	0.0009680589	0.03187314	0.8597231
16159087	C	A	70.85	0.000792506	1.427800	0.467235	0.0022441610	4421	40279	Self-rep Hypothyroidism	16158856	NA	NA	NA
16127430	G	A	34.60	0.000387025	2.135950	0.743623	0.0040742810	4421	40279	Self-rep Hypothyroidism	16127199	0.0008527669	0.02131046	0.9180667
16144080	G	A	318.35	0.003560960	-0.574158	0.219221	0.0088165710	4421	40279	Self-rep Hypothyroidism	16143849	0.007862357	0.01624325	0.7860367
16181861	C	T	84.80	0.000948546	-1.220020	0.470489	0.0095120910	4421	40279	Self-rep Hypothyroidism	16181630	0.0002948313	-0.5142092	0.1057677
POS; Genomic position, AC; Allele count, AF; Allele frequency, HUNT; The Trøndelag Health Study, SE; standard error, p-val; p-value, ctrl; control, freq = frequency, AF; atrial fibrillation, CAD; coronary artery disease, CVD; cardiovascular disease,
DCM; dilated cardiomyopathy, HCM; hypertrophic cardiomyopathy, HF; heart failure, MI; myocardial infarction, istroke; ischemic stroke, nistroke; non-ischemic stroke, self rep; self reported.

## Sheet: Sheet2
Supplementary Table 2: Top five most significant SNPs per disease outcomes in UKB, including validation in HUNT
POS (38)	Allele1	Allele2	AC_Allele2	AF_Allele2	BETA UKB	SE UKB	p-val UKB	N.Cases UKB	N.Controls UKB	phenotype	POS (37)	MAF HUNT	BETA HUNT	p-val HUNT
16079279	G	A	33.1176470	7.5283e-05	3.5446	1.0262	5.5185e-04	12810	207143	AF	16079510	NA	NA	NA
16124996	A	G	64.19215686	0.0001459	2.0995	0.6319	8.9143e-04	12810	207143	AF	16125227	NA	NA	NA
16110997	G	A	1456.40392	0.0033	2.3865	0.1182	1.0869e-03	12810	207143	AF	16111228	NA	NA	NA
16131209	C	T	90.79607843	0.000206	1.4882	0.4731	1.6571e-03	12810	207143	AF	16131440	NA	NA	NA
16162890	C	G	19.09411765	4.3404e-05	4.6791	1.4889	1.6743e-03	12810	207143	AF	16163121	NA	NA	NA
16181641	G	C	20.7333333	4.7131e-05	4.0343	1.1360	4.0135e-03	17430	202523	CAD	16181872	NA	NA	NA
16197842	G	A	24.9490196	5.6714e-05	6.9641	1.1169	9.2969e-04	17430	202523	CAD	16198073	NA	NA	NA
16161026	C	T	63.9803922	0.000145	1.9449	0.5938	1.0548e-03	17430	202523	CAD	16161257	3.52716e-05	-0.131705	0.9704056
16121863	G	T	18.24705882	4.1479e-05	5.3081	1.6218	1.0639e-03	17430	202523	CAD	16122094	NA	NA	NA
16160327	ACT	A	20.8862745	4.7479e-05	3.3034	1.3967	1.0594e-03	17430	202523	CAD	16160558	NA	NA	NA
16100081	C	T	10.3843137	2.3606e-05	-2.1126	0.6344	8.6777e-04	94252	125701	CVD	16100312	NA	NA	NA
16085702	G	A	4410.32941	0.01003	-0.1013	0.0325	1.8356e-03	94252	125701	CVD	16085933	0.0162217	-0.0284237	0.6705108
16105659	TTA	T	17724.96078	0.04029	-0.0508	0.0164	1.9672e-03	94252	125701	CVD	16105891	NA	NA	NA
16081380	G	T	30.82745098	7.0077e-05	-0.3282	0.4296	1.9859e-03	94252	125701	CVD	16081611	NA	NA	NA
16198253	G	A	27.9999999	6.3650e-05	-1.2156	0.4001	2.3818e-03	94252	125701	CVD	16198484	NA	NA	NA
16172723	G	C	11.62745098	2.6432e-05	229.1252	51.1109	7.3635e-06	406	219547	DCM	16172954	NA	NA	NA
16136917	A	T	21.035294117	4.7818e-05	82.8182	16.7042	6.0194e-06	406	219547	DCM	16137148	NA	NA	NA
16163975	T	C	10.2235294	2.32403e-05	86.5588	28.5568	2.4366e-05	406	219547	DCM	16164206	NA	NA	NA
16130014	C	T	74.87450980	0.00017	13.6893	4.6030	2.9396e-04	406	219547	DCM	16130245	NA	NA	NA
16195261	T	C	11.89803922	2.7047e-05	61.8732	21.0186	3.2312e-04	406	219547	DCM	16195492	NA	NA	NA
16123791	G	A	38.3725490	8.7229e-05	7.7722	0.6185	7.5106e-04	196	219757	HCM	16124022	NA	NA	NA
16155467	A	T	469.678431	0.00107	8.3389	2.5600	1.1246e-03	196	219757	HCM	16155698	NA	NA	NA
16181674	T	A	2028.41961	0.00461	2.9613	0.9127	1.1770e-03	196	219757	HCM	16181905	NA	NA	NA
16103830	G	A	14.1607843	3.2190e-05	7.5651	0.6309	1.6534e-03	196	219757	HCM	16104061	NA	NA	NA
16198086	G	A	65.8745098	0.00015	29.3390	9.3973	1.7958e-03	196	219757	HCM	16198317	NA	NA	NA
16197054	C	T	45.82745098	0.0001041	4.7067	1.3120	3.3375e-04	5960	213993	HF	16197285	NA	NA	NA
16197101	A	C	16.2196078	3.6870e-05	12.4549	6.6261	5.5294e-04	5960	213993	HF	16197332	NA	NA	NA
16106288	C	T	15.89803921	3.6139e-05	3.2808	7.3611	6.0606e-04	5960	213993	HF	16106519	NA	NA	NA
16092323	T	C	46.5568627	0.0001058	5.2848	1.6006	9.6070e-04	5960	213993	HF	16092554	NA	NA	NA
16086819	C	T	34.6313725	7.8724e-05	4.4340	1.3677	1.1871e-03	5960	213993	HF	16087050	NA	NA	NA
16194149	A	G	58.8470588	0.00013	2.2096	0.3012	2.2038e-03	61967	157986	hypertension	16194380	NA	NA	NA
16085621	A	G	10.662745	2.4239e-05	2.9839	0.8761	5.9604e-04	61967	157986	hypertension	16085852	NA	NA	NA
16130818	C	G	21.780392	4.9511e-05	1.9742	0.5818	6.8995e-04	61967	157986	hypertension	16131049	NA	NA	NA
16095658	G	A	10.890196	2.4756e-05	2.8831	0.7223	9.6855e-04	61967	157986	hypertension	16095889	NA	NA	NA
16181179	G	A	14.8666667	3.37950e-05	9.1161	0.5954	1.2963e-03	61967	157986	hypertension	16181410	NA	NA	NA
16196282	G	GCTGAGGCAGCCAGATCAC	15.4784313	3.5186e-05	16.9481	7.5260	1.2712e-03	2792	217161	hyperthyroidism	16196514	NA	NA	NA
16155628	C	T	10.0862745	2.2928e-05	17.4327	4.4556	1.3962e-03	2792	217161	hyperthyroidism	16155859	NA	NA	NA
16102295	C	T	11.64313725	2.6467e-05	7.7087	1.5187	2.4147e-03	2792	217161	hyperthyroidism	16102526	NA	NA	NA
16156877	G	A	133.2588235	0.000303	3.0849	1.0192	2.4726e-03	2792	217161	hyperthyroidism	16157108	6.94367e-05	5.55608	0.04829271
16154872	G	A	68.56470589	0.000156	4.8905	1.6335	2.7536e-03	2792	217161	hyperthyroidism	16155103	NA	NA	NA
16085077	A	G	19.643137	4.4653e-05	4.8381	0.9819	9.6095e-06	20287	199666	hypothyroidism	16085077	NA	NA	NA
16146508	C	G	35.0862745	7.9759e-05	10.1495	8.7769	1.0014e-04	20287	199666	hypothyroidism	16146739	NA	NA	NA
16197101	A	C	16.2196078	3.6871e-05	5.6725	1.6687	6.7534e-04	20287	199666	hypothyroidism	16197332	NA	NA	NA
16106288	C	T	15.8980392	3.6139e-05	5.4104	1.6462	1.0194e-02	20287	199666	hypothyroidism	16106519	NA	NA	NA
16164833	C	T	50.8313725	0.000115	7.8608	0.6380	1.1107e-02	20287	199666	hypothyroidism	16165064	NA	NA	NA
16160327	ACT	A	20.8862745	4.7479e-05	21.7935	5.5016	7.4549e-06	3944	216009	MI	16160558	NA	NA	NA
16092115	C	T	30.490196	6.9310e-05	8.8385	2.6910	1.0217e-02	3944	216009	MI	16092346	NA	NA	NA
16102589	G	T	561.0196	0.00128	1.1344	0.5450	1.1544e-03	3944	216009	MI	16102820	NA	NA	NA
16197842	G	A	24.9490196	5.6714e-05	2.2172	0.5398	1.2145e-03	3944	216009	MI	16198073	NA	NA	NA
16104805	A	C	569.7843137	0.0013	1.1091	0.3453	1.3165e-03	3944	216009	MI	16105036	NA	NA	NA
16197054	C	T	45.82745098	0.000104	5.9820	1.5078	7.2654e-06	5311	214642	stroke	16197285	NA	NA	NA
16147354	G	A	19.2078431	4.3663e-05	10.8847	0.2975	1.5790e-04	5311	214642	stroke	16147585	NA	NA	NA
16132005	C	T	11.6509803	2.6485e-05	16.0116	0.7454	7.4041e-04	5311	214642	stroke	16132236	NA	NA	NA
16151150	C	T	44.51372549	0.0001012	4.1821	1.3022	1.3195e-03	5311	214642	stroke	16151381	NA	NA	NA
16086512	C	T	81.6941176	0.000186	3.9905	1.2321	1.4369e-03	5311	214642	stroke	16086743	NA	NA	NA
16197054	C	T	45.827451	0.000104	1.1004	0.1002	1.4704e-02	3338	216615	istroke	16197285	NA	NA	NA
16195973	G	A	20.9215686	4.7559e-05	8.2582	2.5800	1.3704e-03	3338	216615	istroke	16196204	NA	NA	NA
16186544	G	C	22.2666667	5.0616e-05	8.2256	2.5709	1.3777e-03	3338	216615	istroke	16186775	NA	NA	NA
16145809	A	G	23.16862745	5.2667e-05	10.7377	2.5696	1.6782e-03	3338	216615	istroke	16146040	NA	NA	NA
16140887	T	TG	10.6039216	2.4105e-05	17.8418	5.8580	2.3212e-03	3338	216615	istroke	16141119	NA	NA	NA
16140735	G	A	18.3490196	4.1711e-05	14.6071	4.6933	1.8565e-03	1771	218182	nistroke	16140966	NA	NA	NA
16184478	T	C	15.4196078	3.5052e-05	37.7007	12.2350	2.0508e-03	1771	218182	nistroke	16184709	NA	NA	NA
16200991	T	C	87.9686274	0.00020	1.9411	1.6901	2.1188e-03	1771	218182	nistroke	16201222	NA	NA	NA
16127148	A	G	15.117647	3.4366e-05	14.3585	4.6980	2.2408e-03	1771	218182	nistroke	16127379	NA	NA	NA
16089413	G	A	146.972549	0.000334	3.5978	1.1910	2.5214e-03	1771	218182	nistroke	16089644	NA	NA	NA
POS; Genomic position, AC; Allele count, AF; Allele frequency, HUNT; The Trøndelag Health Study, SE; standard error, p-val; p-value, ctrl; control, freq = frequency, AF; atrial fibrillation, CAD; coronary artery disease, CVD; cardiovascular disease,
DCM; dilated cardiomyopathy, HCM; hypertrophic cardiomyopathy, HF; heart failure, MI; myocardial infarction, istroke; ischemic stroke, nistroke; non-ischemic stroke, self rep; self reported.

## Sheet: Sheet3
Supplementary Table 3: Significant SNPs associated with risk factors in HUNT after correction for multiple testing
BP (37)	SNP	ALLELE0	ALLELE1	A1FREQ HUNT	BETA HUNT	SE HUNT	phenotype	pval (HUNT)	pval BH HUNT	p-val UKB
16163086	6:16163086_C/T	C	T	0.0013876	0.387287	0.0559064	Anti-GAD	4.3e-12	2.521477e-07	Phenotype not available
16134185	6:16134185_C/T	C	T	0.012205	0.36472	0.0581702	TSH	3.6e-10	1.055502e-05	0.47
16198285	6:16198285_G/C	G	C	0.000379651	23.9491	3.90952	ASAT	9e-10	1.75917e-05	0.87
16140740	6:16140740_A/G	A	G	0.00137711	1.00479	0.170558	TSH	3.8e-09	4.808398e-05	0.27
16098554	6:16098554_C/A	C	A	0.000337528	2.04342	0.347463	TSH	4.1e-09	4.808398e-05	0.35
16143649	6:16143649_G/A	G	A	0.0029801	6.57072	1.14438	TNI	9.4e-09	8.377e-05	0.46
16196055	6:16196055_T/A	T	A	0.000353607	31.68	5.53233	Icterus	1e-08	8.377e-05	Phenotype not available
16092423	6:16092423_C/T	C	T	0.018645	0.252216	0.0470249	TSH	8.2e-08	0.00060104975	0.91
16175295	6:16175295_A/G	A	G	0.450781	-0.0715258	0.0145471	MCH	1.7e-07	0.0011076256	Phenotype not available
16161654	6:16161654_A/T	A	T	0.00941602	0.00137741	0.000276125	NRbc	6.1e-07	0.003576979	0.83
16161052	6:16161052_T/C	T	C	0.00180422	0.0843583	0.0175315	Peth	1.5e-06	0.0079962273	Phenotype not available
16099068	6:16099068_A/G	A	G	0.000629855	-70.7724	15.1837	Albumin	3.1e-06	0.0151484083	0.67
16126934	6:16126934_G/A	G	A	0.317095	-0.0373686	0.0078694	Cholesterol	3.5e-06	0.015787423	4.5e-18
16126934	6:16126934_G/A	G	A	0.317097	-0.0355559	0.00742392	LDL cholesterol	4.3e-06	0.0175917	1.4e-14
16124560	6:16124560_T/C	T	C	0.320467	-0.0365931	0.00784643	Cholesterol	5.2e-06	0.0175917	1.6e-18
16131156	6:16131156_T/C	T	C	0.318542	-0.0366405	0.0078616	Cholesterol	5.2e-06	0.0175917	3.4e-18
16112720	6:16112720_G/A	G	A	0.00278411	6.61934	1.45484	ASAT	5.4e-06	0.0175917	0.15
16127760	6:16127760_G/A	G	A	0.00278411	6.61934	1.45484	ASAT	5.4e-06	0.0175917	0.13
16131156	6:16131156_T/C	T	C	0.318544	-0.0348184	0.00741656	LDL cholesterol	7e-06	0.021603842	1.5e-14
16124560	6:16124560_T/C	T	C	0.32047	-0.0347969	0.00740225	LDL cholesterol	7.6e-06	0.02228282	1.3e-14
16142121	6:16142121_T/C	T	C	0.0263272	0.172025	0.0398022	TSH	1.5e-05	0.041885	0.71
16181354	6:16181354_G/A	G	A	0.00360331	-0.201897	0.0470122	Lymphocytes	1.8e-05	0.0469112	0.16
16125805	6:16125805_G/A	G	A	0.00344452	0.520043	0.122008	Eosinophils	2e-05	0.0469112	0.44
16190070	6:16190070_G/A	G	A	0.000219298	14.5281	3.48449	Thyroxine (T4)	3.1e-05	0.0469112	Phenotype not available
16146435	6:16146435_C/T	C	T	0.0265702	0.164883	0.039602	TSH	3.1e-05	0.0469112	0.57
16114223	6:16114223_G/T	G	T	0.313202	-0.0313571	0.00743603	LDL cholesterol	3.4e-05	0.0469112	1.9e-12
16187335	6:16187335_A/C	A	C	0.280451	-0.0643358	0.0159892	MCH	3.6e-05	0.0469112	Phenotype not available
16189921	6:16189921_C/A	C	A	0.280451	-0.0643358	0.0159892	MCH	3.6e-05	0.0469112	Phenotype not available
16192759	6:16192759_C/G	C	G	0.280451	-0.0643358	0.0159892	MCH	3.6e-05	0.0469112	Phenotype not available
16160318	6:16160318_C/T	C	T	0.000522232	13.6227	3.29659	ALAT	3.6e-05	0.0469112	0.18
16140296	6:16140296_A/G	A	G	0.00500715	1.40126	0.3392	Vitamin K	3.6e-05	0.0469112	Phenotype not available
16197144	6:16197144_G/A	G	A	0.28047	-0.0642503	0.0159894	MCH	3.7e-05	0.0469112	Phenotype not available
16187522	6:16187522_C/G	C	G	0.281475	-0.0637509	0.015969	MCH	3.9e-05	0.0469112	Phenotype not available
16187699	6:16187699_T/A	T	A	0.281475	-0.0637509	0.015969	MCH	3.9e-05	0.0469112	Phenotype not available
16187971	6:16187971_C/T	C	T	0.281475	-0.0637509	0.015969	MCH	3.9e-05	0.0469112	Phenotype not available
16127407	6:16127407_C/T	C	T	0.22255	-0.0345108	0.00833717	LDL cholesterol	3.9e-05	0.0469112	3.4e-08
16192937	6:16192937_A/G	A	G	0.281311	-0.0638176	0.0159711	MCH	4e-05	0.0469112	Phenotype not available
16128965	6:16128965_C/G	C	G	0.222615	-0.0344414	0.00833539	LDL cholesterol	4e-05	0.0469112	2.3e-08
16186956	6:16186956_G/C	G	C	0.281512	-0.0635426	0.0159692	MCH	4.2e-05	0.0469112	Phenotype not available
16192025	6:16192025_T/C	T	C	0.281493	-0.0635732	0.0159691	MCH	4.2e-05	0.0469112	Phenotype not available
16193010	6:16193010_T/C	T	C	0.281493	-0.0635732	0.0159691	MCH	4.2e-05	0.0469112	Phenotype not available
16193281	6:16193281_G/A	G	A	0.281475	-0.0635556	0.0159703	MCH	4.2e-05	0.0469112	Phenotype not available
16193416	6:16193416_G/T	G	T	0.281475	-0.0635556	0.0159703	MCH	4.2e-05	0.0469112	Phenotype not available
16197492	6:16197492_A/G	A	G	0.28153	-0.0636202	0.0159681	MCH	4.2e-05	0.0469112	Phenotype not available
16198293	6:16198293_C/T	C	T	0.279702	-0.0637114	0.0160053	MCH	4.2e-05	0.0469112	Phenotype not available
16145822	6:16145822_C/T	C	T	0.000261116	19.0957	4.66068	ALAT	4.2e-05	0.0469112	0.28
16195308	6:16195308_T/C	T	C	0.281512	-0.063488	0.0159694	MCH	4.3e-05	0.0469112	Phenotype not available
16196759	6:16196759_G/A	G	A	0.281512	-0.063488	0.0159694	MCH	4.3e-05	0.0469112	Phenotype not available
16196894	6:16196894_G/A	G	A	0.281512	-0.063488	0.0159694	MCH	4.3e-05	0.0469112	Phenotype not available
16196985	6:16196985_T/A	T	A	0.281512	-0.063488	0.0159694	MCH	4.3e-05	0.0469112	Phenotype not available
16197194	6:16197194_G/A	G	A	0.281567	-0.0634776	0.0159669	MCH	4.3e-05	0.0469112	Phenotype not available
16197349	6:16197349_A/G	A	G	0.281585	-0.0634914	0.015967	MCH	4.3e-05	0.0469112	Phenotype not available
16080960	6:16080960_A/G	A	G	0.0002607	0.779499	0.18504	Triglycerides	4.3e-05	0.0469112	0.37
16198121	6:16198121_C/A	C	A	0.281493	-0.063456	0.0159694	MCH	4.4e-05	0.0469112	Phenotype not available
16198247	6:16198247_A/G	A	G	0.280323	-0.0632696	0.0159953	MCH	4.4e-05	0.0469112	Phenotype not available
16114223	6:16114223_G/T	G	T	0.3132	-0.0320406	0.00788224	Cholesterol	4.7e-05	0.048351	6.6e-16
16198304	6:16198304_C/T	C	T	0.0263137	0.161967	0.0398158	TSH	4.7e-05	0.048351	0.82
16188165	6:16188165_A/G	A	G	0.0265162	0.161269	0.0396544	TSH	4.8e-05	0.0485289	0.79
POS; Genomic position, SNP; single-nucleotide polymorphism; A1freq; Allele frequency, HUNT; The Trøndelag Health Study, SE; standard error, pval; p-value, pval_BH; p-value Benjamini-Hochberg, UKB; UK Biobank
Anti-GAD; anti-glutamic acid decarboxylase, TSH; Thyroid-Stimulating Hormone, ASAT; aspartate aminotransferase, TNI; Troponin I, MCH; Mean cell hemoglobin, NRbc; Nucleated Red Blood cells, Peth; Phosphatidyl ethanol, ALAT; alanine aminotransferase.

## Sheet: Sheet4
Supplementary Table 4: Significant SNPs associated with risk factors in UKB after correction for multiple testing
BP (38)	ALLELE1	ALLELE0	A1FREQ	INFOSCORE UKB	BETA UKB	SE UKB	p-val UKB	phenotype	FDR	BP (37)	MAF HUNT	BETA HUNT	p-val HUNT
16128114	C	T	0.999818	0.730041	-0.107928	0.00467303	5.1e-118	NRbc	1.281069e-113	16128345	NA	NA	NA
16143510	C	T	0.999813	0.569318	-3.02611	0.151022	2.6e-89	Lymphocyte	3.26547e-85	16143741	NA	NA	NA
16168523	G	C	0.999924	0.808877	-2.84706	0.189609	5.8e-51	Lymphocyte	4.85634e-47	16168754	NA	NA	NA
16180645	T	C	0.9996	0.794257	-0.039526	0.0029129	6.1e-42	NRbc	3.8306475e-38	16180876	NA	NA	NA
16148724	A	T	0.999909	0.987294	-1.8733	0.157469	1.2e-32	Lymphocyte	6.02856e-29	16148955	NA	NA	NA
16141688	G	A	0.999617	0.79342	-0.893201	0.0844514	3.8e-26	Lymphocyte	1.59087e-22	16141919	0.000292	0.183752	0.26
16168214	A	G	0.999624	0.781191	-0.871013	0.0851637	1.5e-24	Lymphocyte	5.38264e-21	16168445	0.0003109	0.174314	0.27
16187351	A	G	0.99996	0.937742	-0.0844917	0.00837554	6.2e-24	NRbc	1.946725e-20	16187582	NA	NA	NA
16179697	C	T	0.999936	0.966864	-18.4276	1.87648	9.2e-23	ASAT	2.56772e-19	16179928	NA	NA	NA
16130886	T	A	0.999319	0.972968	-0.544716	0.057642	3.4e-21	Lymphocyte	7.99241e-18	16131117	0.000164618	0.13585	0.53
16181937	A	C	0.999936	0.911606	-3.27131	0.346264	3.5e-21	Eosinophill	7.99241e-18	16182168	NA	NA	NA
16080081	G	A	0.999944	0.775382	-26.7779	2.9164	4.2e-20	ALAT	8.79165e-17	16080312	NA	NA	NA
16164907	C	T	0.999306	0.964762	-0.524788	0.0572492	4.9e-20	Lymphocyte	9.46793e-17	16165138	NA	NA	NA
16146684	G	A	0.999935	0.591343	-27.187	2.97213	5.8e-20	ALAT	1.04064e-16	16146915	NA	NA	NA
16110865	T	G	0.999277	0.974355	-0.499056	0.0558495	4e-19	Lymphocyte	6.6984e-16	16111096	0.000146327	0.144276	0.53
16112241	G	A	0.999942	0.912439	-1.80798	0.203552	6.6e-19	Lymphocyte	1.036159e-15	16112472	NA	NA	NA
16124329	T	C	0.695596	0.990495	0.0318222	0.00362227	1.6e-18	Cholesterol	2.36414e-15	16124560	0.320467	-0.0365931	3.1e-06
16130925	T	C	0.698242	0.990004	0.0315731	0.00363004	3.4e-18	Cholesterol	4.7447e-15	16131156	0.318542	-0.0366405	3.2e-06
16126703	G	A	0.698472	0.991007	0.0314544	0.00363027	4.5e-18	Cholesterol	5.9492e-15	16126934	0.317095	-0.0373686	2.0e-06
16134016	C	T	0.545545	0.98601	0.0288464	0.00334946	7.2e-18	Cholesterol	9.04284e-15	16134247	0.474914	-0.0231679	0.0016
16152257	G	A	0.99996	0.824065	-22.4452	2.66442	3.6e-17	ASAT	4.3061e-14	16152488	NA	NA	NA
16100430	T	C	0.999112	0.941216	-0.42445	0.0505912	4.9e-17	Lymphocyte	5.59469e-14	16100661	0.000237782	0.153416	0.4
16131066	G	C	0.54947	0.9881	0.0278898	0.00334907	8.2e-17	Cholesterol	8.95547e-14	16131297	0.473554	-0.0230846	0.0017
16114017	A	G	0.553901	0.986328	0.0277708	0.00335561	1.3e-16	Cholesterol	1.306188e-13	16114248	0.469333	-0.0204557	0.0054
16128841	A	G	0.549883	0.990024	0.0276979	0.00334686	1.3e-16	Cholesterol	1.306188e-13	16129072	0.473913	-0.0233254	0.0015
16126442	G	T	0.550389	0.989712	0.0276569	0.00334763	1.4e-16	Cholesterol	1.35256e-13	16126673	0.473488	-0.0228453	0.0019
16089359	AAGG	A	0.998455	0.899026	-0.011435	0.00138679	1.6e-16	NRbc	1.48853e-13	NA	NA	NA	NA
16113090	G	A	0.554139	0.986313	0.0276505	0.00335596	1.7e-16	Cholesterol	1.52508e-13	16113321	0.469387	-0.0206135	0.005
16113502	C	T	0.554355	0.985692	0.0275286	0.00335596	2.3e-16	Cholesterol	1.9922e-13	16113733	0.469039	-0.0203176	0.0057
16113791	C	T	0.554308	0.985687	0.0274206	0.00335621	3.1e-16	Cholesterol	2.59563e-13	16114022	0.469028	-0.0202352	0.0059
16087924	A	G	0.998441	0.913972	-0.0111361	0.0013717	4.7e-16	NRbc	3.80836e-13	16088155	0.000731342	-0.000419447	0.67
16113992	G	T	0.713562	0.986127	0.029826	0.00369275	6.6e-16	Cholesterol	5.180794e-13	16114223	0.3132 -0.0320406		4.8e-05
16082212	T	G	0.999948	0.990245	-2.9785	0.37037	8.8e-16	Eosinophill	6.6984e-13	16082443	NA	NA	NA
16145094	A	G	0.538664	0.999475	0.025912	0.00332866	7e-15	Cholesterol	5.171559e-12	16145325	0.469224	-0.0210974	0.0041
16124329	T	C	0.696856	0.990495	0.0145175	0.00188426	1.3e-14	LDL	9.32991e-12	16124560	0.32047	-0.0347969	2.6e-06
16126703	G	A	0.699655	0.991007	0.014531	0.00188808	1.4e-14	LDL	9.7685e-12	16126934	0.317097	-0.0355559	1.7e-06
16130925	T	C	0.699403	0.990004	0.0145098	0.00188788	1.5e-14	LDL	1.0183e-11	16131156	0.318544	-0.0348184	2.7e-06
16192841	G	A	0.999667	0.847836	-0.680246	0.0885591	1.6e-14	Lymphocyte	1.05764e-11	16193072	NA	NA	NA
16134016	C	T	0.545572	0.98601	0.0131958	0.00174009	3.4e-14	LDL	2.18986e-11	16134247	0.474922	-0.0228626	0.00098
16113090	G	A	0.554385	0.986313	0.01315	0.0017445	4.8e-14	LDL	3.01428e-11	16113321	0.469395	-0.0207449	0.0028
16114017	A	G	0.554134	0.986328	0.0131302	0.00174435	5.2e-14	LDL	3.18582e-11	16114248	0.46934	-0.0206286	0.0029
16122129	C	G	0.795561	0.993092	0.0310125	0.00413148	6.1e-14	Cholesterol	3.64824e-11	16122360	0.225332	-0.0326828	0.0002
16113502	C	T	0.554536	0.985692	0.0130549	0.00174448	7.2e-14	LDL	4.20597e-11	16113733	0.469046	-0.0204956	0.0031
16113791	C	T	0.55449	0.985687	0.0130194	0.00174453	8.5e-14	LDL	4.8525341e-11	16114022	0.469036	-0.0204617	0.0032
16128734	C	G	0.798372	0.995133	0.0307223	0.00414995	1.3e-13	Cholesterol	7.2566e-11	16128965	0.222613	-0.034708	8.6e-05
16120588	C	T	0.796003	0.985484	0.0305839	0.00414842	1.7e-13	Cholesterol	9.2831e-11	16120819	0.2227	-0.0330555	0.00018
16127176	C	T	0.798183	0.999196	0.0304409	0.00414289	2e-13	Cholesterol	1.06889e-10	16127407	0.222547	-0.0348879	7.9e-05
16131066	G	C	0.549554	0.9881	0.0127195	0.00174011	2.7e-13	LDL	1.4129e-10	16131297	0.473562	-0.0228571	0.00099
16126442	G	T	0.550456	0.989712	0.0126316	0.0017392	3.8e-13	LDL	1.9480e-10	16126673	0.473496	-0.0224549	0.0012
16128841	A	G	0.550005	0.990024	0.0126085	0.00173905	4.2e-13	LDL	2.109996e-10	16129072	0.473921	-0.0231191	0.00086
16113992	G	T	0.714511	0.986127	0.0135199	0.0019205	1.9e-12	LDL	9.3581e-10	16114223	0.313202	-0.0313571	2.5e-05
16189953	C	G	0.999937	0.625328	-1.52143	0.22017	4.8e-12	Lymphocyte	2.31868e-09	16190184	NA	NA	NA
16107159	C	T	0.999959	0.825142	-0.067949	0.0100635	1.5e-11	NRbc	7.10915e-09	16107390	NA	NA	NA
16107636	A	C	0.515564	0.984882	0.0116608	0.00173487	1.8e-11	LDL	8.373e-09	16107867	0.521162	-0.0251554	0.00028
16108932	A	C	0.515562	0.984838	0.01165	0.00173487	1.9e-11	LDL	8.6775e-09	16109163	0.520204	-0.0251456	0.00028
16106837	A	G	0.533966	0.988244	0.0116071	0.00173635	2.3e-11	LDL	1.03167e-08	16107068	0.498705	-0.0247782	0.00035
16109955	C	T	0.53401	0.988337	0.0115971	0.00173617	2.4e-11	LDL	1.05764e-08	16110186	0.498042	-0.0248949	0.00032
16145094	A	G	0.538544	0.999475	0.0113949	0.00172884	4.4e-11	LDL	1.90558e-08	16145325	0.469221	-0.0221865	0.0014
16146684	G	A	0.999934	0.591343	-15.1809	2.31423	5.4e-11	ASAT	2.299028e-08	16146915	NA	NA	NA
16108200	C	T	0.530293	0.997998	0.0113085	0.00172989	6.3e-11	LDL	2.637495e-08	16108431	0.498259	-0.0246845	0.00036
16106837	A	G	0.533477	0.988244	0.0214724	0.00333776	1.2e-10	Cholesterol	4.941443e-08	16107068	0.498695	-0.0233992	0.0014
16158813	T	C	0.999889	0.940926	-11.85	1.84722	1.4e-10	ALAT	5.67203e-08	16159044	NA	NA	NA
16109955	C	T	0.533453	0.988337	0.0213539	0.0033378	1.6e-10	Cholesterol	6.379429e-08	16110186	0.498031	-0.0236625	0.0013
16108932	A	C	0.514755	0.984838	0.0212443	0.00333542	1.9e-10	Cholesterol	7.4572e-08	16109163	0.520191	-0.0248048	0.00072
16107636	A	C	0.514749	0.984882	0.0212231	0.00333536	2e-10	Cholesterol	7.7289e-08	16107867	0.521148	-0.0246132	0.0008
16185635	C	G	0.999821	0.734856	-8.06328	1.28219	3.2e-10	ASAT	1.21789e-07	16185866	NA	NA	NA
16116348	A	T	0.999432	0.838685	-0.429507	0.0683864	3.4e-10	Lymphocyte	1.274696e-07	16116579	1.82909e-05	-0.926634	0.16
16108200	C	T	0.529701	0.997998	0.0207343	0.00332536	4.5e-10	Cholesterol	1.662287e-07	16108431	0.498249	-0.023386	0.0014
16103554	T	G	0.999953	0.859914	-0.0504996	0.00811682	4.9e-10	NRbc	1.78381e-07	16103785	NA	NA	NA
16133589	C	G	0.796178	0.998977	0.025344	0.00412282	7.9e-10	Cholesterol	2.83486e-07	16133820	0.218533	-0.0315932	0.00035
16175064	A	G	0.571392	0.978109	0.0207544	0.0033872	8.9e-10	Cholesterol	3.14872e-07	16175295	0.452623	-0.0152825	0.039
16134371	T	A	0.7857	0.985034	0.0249139	0.00406914	9.2e-10	Cholesterol	3.20965e-07	16134602	0.233481	-0.0249082	0.0039
16198280	T	C	0.565472	0.952275	0.0209337	0.00342499	9.8e-10	Cholesterol	3.3721e-07	16198511	NA	NA	NA
16133589	C	G	0.796703	0.998977	0.0129479	0.00214867	1.7e-09	LDL	5.69364e-07	16133820	0.218524	-0.0306254	0.00024
16198280	T	C	0.565095	0.952275	0.0107242	0.00178005	1.7e-09	LDL	5.69364e-07	16198511	NA	NA	NA
16175064	A	G	0.570915	0.978109	0.0105089	0.00176042	2.4e-09	LDL	7.93231e-07	16175295	0.452639	-0.0173399	0.013
16134371	T	A	0.786201	0.985034	0.0126255	0.00211925	2.6e-09	LDL	8.48174e-07	16134602	0.233473	-0.0248645	0.0022
16142128	A	G	0.694838	0.993446	0.0208554	0.00361122	7.7e-09	Cholesterol	2.479696e-06	16142359	0.30886	-0.0131139	0.1
16141371	A	G	0.695095	0.993254	0.0208295	0.00361215	8.1e-09	Cholesterol	2.57549e-06	16141602	0.308838	-0.0130947	0.1
16148513	G	A	0.694315	0.999478	0.020682	0.00360187	9.4e-09	Cholesterol	2.91504e-06	16148744	0.308958	-0.0133479	0.094
16180672	A	G	0.999912	0.912661	-0.033523	0.00583693	9.3e-09	NRbc	2.91504e-06	16180903	NA	NA	NA
16148512	A	T	0.695213	0.994072	0.0207256	0.00361172	9.6e-09	Cholesterol	2.94076e-06	16148743	0.308958	-0.0133479	0.094
16144383	T	C	0.693922	0.999769	0.0206437	0.00360009	9.8e-09	Cholesterol	2.96586e-06	16144614	0.308359	-0.0122438	0.12
16140355	TA	T	0.695479	0.993314	0.0206224	0.00361323	1.1e-08	Cholesterol	3.25069e-06	16140355	NA	NA	NA
16186725	G	C	0.741062	0.991203	0.0217277	0.0038046	1.1e-08	Cholesterol	3.25069e-06	16186956	0.282664	-0.0240547	0.003
16140596	C	G	0.69545	0.993346	0.0205592	0.00361306	1.3e-08	Cholesterol	3.29845e-06	16140827	NA	NA	NA
16187104	A	C	0.742459	0.990371	0.0217059	0.00381141	1.2e-08	Cholesterol	3.29845e-06	16187335	0.281597	-0.0239066	0.0032
16187291	C	G	0.74108	0.991444	0.0216628	0.00380463	1.2e-08	Cholesterol	3.29845e-06	16187522	0.282642	-0.0240119	0.0031
16187468	T	A	0.741105	0.991349	0.0216726	0.00380494	1.2e-08	Cholesterol	3.29845e-06	16187699	0.282642	-0.0240119	0.0031
16187740	C	T	0.741122	0.991145	0.0216346	0.00380505	1.3e-08	Cholesterol	3.29845e-06	16187971	0.282642	-0.0240119	0.0031
16188940	TATATC	T	0.742451	0.990235	0.0216779	0.00381189	1.3e-08	Cholesterol	3.29845e-06	NA	NA	NA	NA
16189690	C	A	0.742355	0.990463	0.0217279	0.00381093	1.2e-08	Cholesterol	3.29845e-06	16189921	0.281597	-0.0239066	0.0032
16191329	AT	A	0.74236	0.990514	0.0216896	0.00381056	1.3e-08	Cholesterol	3.29845e-06	16191561	NA	NA	NA
16191794	T	C	0.740882	0.991757	0.0216116	0.00380338	1.3e-08	Cholesterol	3.29845e-06	16192025	0.282664	-0.0240528	0.003
16192528	C	G	0.742388	0.990588	0.0216712	0.00381084	1.3e-08	Cholesterol	3.29845e-06	16192759	0.281587	-0.0238265	0.0033
16196963	G	A	0.739912	0.999395	0.0215526	0.00378953	1.3e-08	Cholesterol	3.29845e-06	16197194	0.282729	-0.0239108	0.0032
16197890	C	A	0.740905	0.991561	0.0216685	0.00380414	1.2e-08	Cholesterol	3.29845e-06	16198121	0.282609	-0.0240666	0.003
16198016	A	G	0.740883	0.991537	0.0216813	0.00380398	1.2e-08	Cholesterol	3.29845e-06	16198247	0.281619	-0.0229917	0.0046
16198062	C	T	0.742216	0.990271	0.0216556	0.00381063	1.3e-08	Cholesterol	3.29845e-06	16198293	0.281032	-0.0230434	0.0046
16192779	T	C	0.740827	0.99149	0.0216012	0.00380336	1.4e-08	Cholesterol	3.3176e-06	16193010	0.282631	-0.0239925	0.0031
16193050	G	A	0.740894	0.991514	0.0215724	0.00380359	1.4e-08	Cholesterol	3.3176e-06	16193281	0.28262	-0.0240196	0.0031
16195077	T	C	0.740977	0.991462	0.0215979	0.00380468	1.4e-08	Cholesterol	3.3176e-06	16195308	0.282653	-0.0239744	0.0031
16196528	G	A	0.740979	0.991742	0.021601	0.00380414	1.4e-08	Cholesterol	3.3176e-06	16196759	0.282653	-0.0239744	0.0031
16196754	T	A	0.740974	0.991697	0.0215838	0.00380413	1.4e-08	Cholesterol	3.3176e-06	16196985	0.282653	-0.0239744	0.0031
16197118	A	G	0.741074	0.991591	0.0215831	0.00380477	1.4e-08	Cholesterol	3.3176e-06	16197349	0.282729	-0.0238728	0.0032
16197261	A	G	0.74098	0.991629	0.021598	0.00380411	1.4e-08	Cholesterol	3.3176e-06	16197492	0.282674	-0.0238434	0.0033
16137886	TA	T	0.695529	0.985919	0.0205022	0.00362198	1.5e-08	Cholesterol	3.3641e-06	NA	NA	NA	NA
16192706	A	G	0.740831	0.991479	0.0215515	0.00380332	1.5e-08	Cholesterol	3.3641e-06	16192937	0.282359	-0.02459	0.0024
16193185	G	T	0.740923	0.991713	0.0215519	0.00380377	1.5e-08	Cholesterol	3.3641e-06	16193416	0.282642	-0.024	0.0031
16196663	G	A	0.740951	0.991684	0.0215222	0.00380412	1.5e-08	Cholesterol	3.36415e-06	16196894	0.282653	-0.0239744	0.0031
16196913	G	A	0.742402	0.990532	0.0215624	0.0038112	1.5e-08	Cholesterol	3.3641e-06	16197144	0.281597	-0.0238283	0.0033
16187468	T	A	0.74147	0.991349	0.0112022	0.0019783	1.5e-08	LDL	3.3641e-06	16187699	0.282642	-0.0253997	0.0009
16138132	C	G	0.695048	0.986539	0.0204343	0.00361974	1.6e-08	Cholesterol	3.3773e-06	16138363	0.307957	-0.0133246	0.095
16198668	C	T	0.742774	0.967392	0.0217745	0.00385717	1.6e-08	Cholesterol	3.3773e-06	16198899	NA	NA	NA
16198757	G	A	0.74263	0.967392	0.0217733	0.00385621	1.6e-08	Cholesterol	3.3773e-06	16198988	NA	NA	NA
16122129	C	G	0.796299	0.993092	0.0121658	0.00215108	1.6e-08	LDL	3.3773e-06	16122360	0.220957	-0.0778847	0.67
16187291	C	G	0.74145	0.991444	0.0111837	0.00197818	1.6e-08	LDL	3.3773e-06	16187522	0.282642	-0.0253997	0.0009
16192779	T	C	0.741209	0.99149	0.0111687	0.0019776	1.6e-08	LDL	3.3773e-06	16193010	0.282631	-0.0253992	0.0009
16197118	A	G	0.741458	0.991591	0.01117	0.00197844	1.6e-08	LDL	3.3773e-06	16197349	0.282729	-0.0252359	0.00097
16198429	T	C	0.741343	0.967945	0.0217384	0.00385106	1.7e-08	Cholesterol	3.389e-06	16198660	NA	NA	NA
16198640	T	G	0.741158	0.968291	0.0217065	0.00384968	1.7e-08	Cholesterol	3.389e-06	16198871	NA	NA	NA
16186725	G	C	0.741441	0.991203	0.0111577	0.00197815	1.7e-08	LDL	3.389e-06	16186956	0.282664	-0.0230434	0.0046
16187740	C	T	0.741492	0.991145	0.0111655	0.00197846	1.7e-08	LDL	3.389e-06	16187971	0.282642	-0.0253997	0.0009
16191794	T	C	0.741256	0.991757	0.0111577	0.0019776	1.7e-08	LDL	3.389e-06	16192025	0.282664	-0.0254351	0.00089
16193185	G	T	0.741286	0.991713	0.0111483	0.00197784	1.7e-08	LDL	3.389e-06	16193416	0.282642	-0.0254097	0.0009
16196963	G	A	0.740316	0.999395	0.0111113	0.00197061	1.7e-08	LDL	3.389e-06	16197194	0.281597	-0.0252657	0.00096
16192706	A	G	0.741199	0.991479	0.0111396	0.0019775	1.8e-08	LDL	3.532e-06	16192937	0.282359	-0.025819	0.00074
16198640	T	G	0.741565	0.968291	0.0112639	0.00200183	1.8e-08	LDL	3.532e-06	16198871	NA	NA	NA
16193050	G	A	0.741273	0.991514	0.0111234	0.00197773	1.9e-08	LDL	3.61561e-06	16193281	0.282618	-0.0254468	0.00088
16196754	T	A	0.741352	0.991697	0.0111165	0.00197807	1.9e-08	LDL	3.61561e-06	16196985	0.282653	-0.0253718	0.00091
16197261	A	G	0.741351	0.991629	0.0111105	0.00197808	1.9e-08	LDL	3.61561e-06	16197492	0.282674	-0.0252312	0.00097
16198016	A	G	0.741256	0.991537	0.0111159	0.00197805	1.9e-08	LDL	3.61561e-06	16198247	0.281619	-0.0244127	0.0014
16198383	A	C	0.747189	0.966752	0.0217977	0.00388119	2e-08	Cholesterol	3.69397e-06	16198614	NA	NA	NA
16195077	T	C	0.741353	0.991462	0.011103	0.00197841	2e-08	LDL	3.69397e-06	16195308	0.282653	-0.0253718	0.00091
16196528	G	A	0.741361	0.991742	0.0111082	0.00197813	2e-08	LDL	3.69397e-06	16196759	0.282653	-0.0253718	0.00091
16197890	C	A	0.741282	0.991561	0.0111084	0.00197814	2e-08	LDL	3.69397e-06	16198121	0.282609	-0.0254044	0.0009
16198418	T	C	0.742788	0.967235	0.0216248	0.00385769	2.1e-08	Cholesterol	3.85036e-06	16198649	NA	NA	NA
16103554	T	G	0.999953	0.859914	-1.29511	0.231525	2.2e-08	Lymphocyte	4.00448e-06	16103785	NA	NA	NA
16128734	C	G	0.799039	0.995133	0.0120643	0.0021599	2.3e-08	LDL	4.12669e-06	16128965	0.222615	-0.0344414	3.6e-05
16196663	G	A	0.741325	0.991684	0.011057	0.00197808	2.3e-08	LDL	4.12669e-06	16196894	0.282651	-0.0253718	0.00091
16198306	A	G	0.743041	0.96776	0.0111996	0.00200606	2.4e-08	LDL	4.27557e-06	16198537	NA	NA	NA
16198306	A	G	0.742619	0.96776	0.0215031	0.0038574	2.5e-08	Cholesterol	4.42236e-06	16198537	NA	NA	NA
16180548	T	C	0.749261	0.988326	0.0214157	0.00384811	2.6e-08	Cholesterol	4.5041e-06	16180779	0.2664	-0.0266409	0.0013
16120588	C	T	0.796711	0.985484	0.012018	0.00216012	2.6e-08	LDL	4.5041e-06	16120819	0.222702	-0.0324882	9.6e-05
16198429	T	C	0.741785	0.967945	0.0111522	0.00200248	2.6e-08	LDL	4.5041e-06	16198660	NA	NA	NA
16187104	A	C	0.742801	0.990371	0.0109893	0.00198137	2.9e-08	LDL	4.98939e-06	16187335	0.281595	-0.0253333	0.00094
16198292	G	C	0.743993	0.966923	0.0213938	0.0038639	3.1e-08	Cholesterol	5.2972e-06	16198523	NA	NA	NA
16189690	C	A	0.742728	0.990463	0.0109599	0.00198125	3.2e-08	LDL	5.4311e-06	16189921	0.281595	-0.0253333	0.00094
16127176	C	T	0.798836	0.999196	0.0119063	0.0021562	3.4e-08	LDL	5.6559e-06	16127407	0.22255	-0.0345108	3.5e-05
16180548	T	C	0.749518	0.988326	0.0110425	0.00200014	3.4e-08	LDL	5.6559e-06	16180779	0.266407	-0.026667	0.00063
16196913	G	A	0.742758	0.990532	0.010932	0.00198155	3.4e-08	LDL	5.6559e-06	16197144	0.281595	-0.0252499	0.00098
16188940	TATATC	T	0.742799	0.990235	0.0109315	0.00198171	3.5e-08	LDL	5.78398e-06	NA	NA	NA	NA
16192528	C	G	0.742764	0.990588	0.0109142	0.00198117	3.6e-08	LDL	5.910e-06	16192759	0.281585	-0.0252602	0.00097
16191329	AT	A	0.742716	0.990514	0.0109063	0.0019811	3.7e-08	LDL	6.035e-06	16191561	NA	NA	NA
16198668	C	T	0.74315	0.967392	0.0110284	0.00200531	3.8e-08	LDL	6.1582e-06	16198899	NA	NA	NA
16198062	C	T	0.742585	0.990271	0.0108873	0.00198131	3.9e-08	LDL	6.27975e-06	16198293	0.28103	-0.0244238	0.0014
16198418	T	C	0.743206	0.967235	0.0109563	0.00200567	4.7e-08	LDL	7.4721e-06	16198649	NA	NA	NA
16198757	G	A	0.743032	0.967392	0.0109508	0.00200495	4.7e-08	LDL	7.4721e-06	16198988	NA	NA	NA
16198292	G	C	0.744409	0.966923	0.0109683	0.00200923	4.8e-08	LDL	7.5357e-06	16198523	NA	NA	NA
16198413	G	A	0.995627	0.949934	-0.00442097	0.000809754	4.8e-08	NRbc	7.5357e-06	16198644	NA	NA	NA
16148986	T	G	0.902393	0.992151	0.0305174	0.00561998	5.6e-08	Cholesterol	8.737e-06	16149217	0.101445	-0.0401963	0.00091
16110214	G	A	0.776488	0.980161	0.0215896	0.00401224	7.4e-08	Cholesterol	1.1474e-05	16110445	0.246622	-0.0223361	0.0087
16110535	AT	A	0.776697	0.978909	0.0215869	0.00401585	7.6e-08	Cholesterol	1.17119e-05	16110766	NA	NA	NA
16108964	C	T	0.995994	0.958537	-0.128313	0.0238908	7.8e-08	Lymphocyte	1.19468e-05	16109195	NA	NA	NA
16147118	T	C	0.902114	0.992898	0.029955	0.00561227	9.4e-08	Cholesterol	1.43102e-05	16147349	0.101401	-0.0401743	0.00092
16198383	A	C	0.747694	0.966752	0.0107404	0.00201863	1e-07	LDL	1.51319e-05	16198614	NA	NA	NA
16116959	CT	C	0.999843	0.954931	-8.08867	1.52343	1.1e-07	ALAT	1.6447e-05	16117190	NA	NA	NA
16185635	C	G	0.999821	0.734856	-8.7501	1.64554	1.1e-07	ALAT	1.6447e-05	16185866	NA	NA	NA
16141385	G	A	0.90297	0.992076	0.0298194	0.00563437	1.2e-07	Cholesterol	1.7627e-05	16141616	0.101379	-0.0399101	0.00099
16189387	C	T	0.759075	0.990878	0.0107189	0.00202467	1.2e-07	LDL	1.7627e-05	16189618	0.265515	-0.022607	0.0037
16190280	T	C	0.758978	0.990791	0.0107303	0.00202449	1.2e-07	LDL	1.7627e-05	16190511	NA	NA	NA
16148861	T	C	0.900914	0.990054	0.0292252	0.00558652	1.7e-07	Cholesterol	2.4827e-05	16149092	0.102021	-0.0412089	0.00024
16118637	C	T	0.880282	0.984819	0.0269012	0.00515185	1.8e-07	Cholesterol	2.6135e-05	16118868	0.135658	-0.0302062	0.0026
16142853	C	T	0.999928	0.739919	-0.0359491	0.00693914	2.2e-07	NRbc	3.17597e-05	16143084	NA	NA	NA
16080729	A	G	0.999833	0.843512	-8.05446	1.55944	2.4e-07	ALAT	3.425318e-05	16080960	0.000261116	0.252992	0.96
16178069	A	G	0.999839	0.957329	-7.75565	1.50075	2.4e-07	ALAT	3.425318e-05	16178300	NA	NA	NA
16161395	C	T	0.999955	0.830978	-13.9366	2.73461	3.5e-07	ASAT	4.9670e-05	16161626	NA	NA	NA
16145242	C	T	0.903202	0.994036	0.0286386	0.00563964	3.8e-07	Cholesterol	5.36248e-05	16145473	0.100607	-0.0418733	0.00024
16189387	C	T	0.758818	0.990878	0.0197401	0.00389276	4e-07	Cholesterol	5.61318e-05	16189618	0.265519	-0.0193153	0.018
16190280	T	C	0.758725	0.990791	0.0197077	0.00389248	4.1e-07	Cholesterol	5.72155e-05	16190511	0.265519	-0.0193153	0.018
16080368	C	T	0.999915	0.955345	-10.3855	2.07303	5.4e-07	ALAT	7.49407e-05	16080599	NA	NA	NA
16110535	AT	A	0.777506	0.978909	0.0104167	0.00209429	6.6e-07	LDL	9.109e-05	16110766	NA	NA	NA
16110214	G	A	0.777294	0.980161	0.0103926	0.00209236	6.8e-07	LDL	9.3338e-05	16110445	0.246627	-0.0243925	0.0013
16115689	A	G	0.999839	0.684221	-0.0242257	0.00502477	1.4e-06	NRbc	0.0001911	16115920	1.83e-05	-0.00140056	0.82
16185050	A	G	0.784014	0.988833	0.0101368	0.00210594	1.5e-06	LDL	0.0002037	16185281	0.2316	-0.0212739	0.013
16174791	G	A	0.78769	0.988843	0.010175	0.00211861	1.6e-06	LDL	0.000216	16175022	0.2209	-0.0242036	0.006
16145428	T	A	0.999854	0.851588	-0.630661	0.132561	2e-06	Lymphocyte	0.0002687	16145659	NA	NA	NA
16166229	T	TATGA	0.755769	0.990323	0.00948649	0.00201422	2.5e-06	LDL	0.00033403	16166461	NA	NA	NA
16160338	G	T	0.755671	0.991499	0.00940958	0.00201244	2.9e-06	LDL	0.000385	16160569	0.254994	-0.024559	0.0036
16162277	T	C	0.755536	0.99151	0.00939701	0.00201223	3e-06	LDL	0.0003966	16162508	0.255124	-0.0250857	0.0028
16183014	G	A	0.999934	0.869615	-0.0332489	0.0071748	3.6e-06	NRbc	0.0004734	16183245	0	0	1
16195089	G	A	0.995368	0.884032	-0.106296	0.0233224	5.2e-06	Lymphocyte	0.0006803	16195320	0.001866	0.0169628	0.79
16196738	G	A	0.999958	0.680178	-0.0459442	0.0101513	6e-06	NRbc	0.000781	16196969	0.00042	-0.000786414	0.54
16153193	C	T	0.999929	0.86937	-0.0318992	0.00705307	6.1e-06	NRbc	0.0007899	16153424	0	0	1
16142853	C	T	0.999928	0.739919	-0.881447	0.197932	8.5e-06	Lymphocyte	0.001095	16143084	NA	NA	NA
16152257	G	A	0.99996	0.824065	-15.1368	3.42188	9.7e-06	ALAT	0.001243	16152488	NA	NA	NA
16130102	A	G	0.900344	0.98722	0.0127281	0.00288687	1e-05	LDL	0.001269	16130333	0.0953847	-0.0212048	0.13
16121354	C	T	0.999956	0.569462	-0.0476074	0.0107954	1e-05	NRbc	0.001269	16121585	NA	NA	NA
16080368	C	T	0.999917	0.955345	-7.15366	1.6383	1.3e-05	ASAT	0.00162	16080599	NA	NA	NA
16119809	G	C	0.932984	0.980031	0.029196	0.00668874	1.3e-05	Cholesterol	0.00162	16120040	0.0732578	-0.0225854	0.13
16132129	A	G	0.999867	0.855956	-0.606943	0.139013	1.3e-05	Lymphocyte	0.00162	16132360	NA	NA	NA
16127642	G	A	0.900898	0.988109	0.0125296	0.00289318	1.5e-05	LDL	0.001856	16127873	0.0949386	-0.0215508	0.13
16169003	C	T	0.999943	0.811738	-0.0329942	0.00762768	1.5e-05	NRbc	0.001856	16169234	NA	NA	NA
16080729	A	G	0.999835	0.843512	-5.28678	1.22444	1.6e-05	ASAT	0.00197	16080960	0.00012655	-6.74027	0.32
16126545	A	T	0.901797	0.988403	0.0124853	0.00290711	1.7e-05	LDL	0.002083	16126776	0.094819	-0.0226885	0.1
16174791	G	A	0.78753	0.988843	0.0174753	0.00407408	1.8e-05	Cholesterol	0.002195	16175022	0.220894	-0.0231597	0.0056
16124862	C	G	0.901539	0.989681	0.0123841	0.0029024	2e-05	LDL	0.002415	16125093	0.0950148	-0.0224071	0.11
16132178	C	T	0.902012	0.989205	0.0123981	0.00290802	2e-05	LDL	0.002415	16132409	0.094547	-0.0226157	0.1
16119650	G	A	0.933235	0.981155	0.0284581	0.00669567	2.1e-05	Cholesterol	0.0025119	16119881	0.0731381	-0.0201308	0.19
16115951	C	G	0.999852	0.917926	-0.965154	0.226939	2.1e-05	Eosinophill	0.0025119	16116182	NA	NA	NA
16118637	C	T	0.880484	0.984819	0.0113433	0.0026824	2.3e-05	LDL	0.002738	16118868	0.135651	-0.0303966	0.00098
16089276	C	T	0.999914	0.913404	-0.680933	0.161327	2.4e-05	Lymphocyte	0.00284	16089507	NA	NA	NA
16185050	A	G	0.783833	0.988833	0.0170456	0.00404864	2.6e-05	Cholesterol	0.003066	16185281	0.231609	-0.0197747	0.013
16129397	C	T	0.999852	0.916093	-0.953056	0.227005	2.7e-05	Eosinophill	0.003169	16129628	NA	NA	NA
16131114	C	G	0.999852	0.913506	-0.955698	0.227922	2.8e-05	Eosinophill	0.003256	16131345	NA	NA	NA
16168805	CA	C	0.999858	0.901552	-0.980404	0.234129	2.8e-05	Eosinophill	0.003256	16169036	NA	NA	NA
16161883	A	G	0.999919	0.875416	-7.35582	1.75875	2.9e-05	ASAT	0.003326	16162114	NA	NA	NA
16108777	C	T	0.910731	0.980979	0.0245751	0.00587769	2.9e-05	Cholesterol	0.003326	16109008	0.090827	-0.0178366	0.14
16182211	A	G	0.999859	0.901537	-0.982759	0.23499	2.9e-05	Eosinophill	0.003326	16182442	NA	NA	NA
16180672	A	G	0.999912	0.912661	-0.690283	0.166493	3.4e-05	Lymphocyte	0.003882	16180903	NA	NA	NA
16126739	A	G	0.935978	0.999061	0.0280261	0.00678473	3.6e-05	Cholesterol	0.0040918	16126970	0.0683079	-0.0210883	0.17
16162277	T	C	0.75507	0.99151	0.0159238	0.00387124	3.9e-05	Cholesterol	0.0044128	16162508	0.255129	-0.0249919	0.0024
16160338	G	T	0.755192	0.991499	0.0158321	0.00387175	4.3e-05	Cholesterol	0.00482195	16160569	0.254999	-0.024465	0.003
16166229	T	TATGA	0.755264	0.990323	0.0158494	0.00387461	4.3e-05	Cholesterol	0.00482195	16166461	NA	NA	NA
16086512	C	T	0.999815	0.605366	-0.0209555	0.00513001	4.4e-05	NRbc	0.00491216	16086743	NA	NA	NA
16142128	A	G	0.694165	0.993446	0.00755085	0.00187683	5.7e-05	LDL	0.006335	16142359	0.308872	-0.0149348	0.04
16180230	G	A	0.99941	0.951219	-0.250235	0.062621	6.4e-05	Lymphocyte	0.007082	16180461	0.000475563	-0.110442	0.39
16186092	A	C	0.999934	0.984984	-7.22952	1.81564	6.8e-05	ASAT	0.007459	16186323	NA	NA	NA
16141371	A	G	0.694435	0.993254	0.00747685	0.00187727	6.8e-05	LDL	0.007459	16141602	0.30885	-0.014856	0.041
16148512	A	T	0.694539	0.994072	0.00744623	0.00187727	7.3e-05	LDL	0.00797	16148743	0.308969	-0.0150209	0.036
16198138	C	T	0.999879	0.888131	-5.51062	1.39535	7.8e-05	ASAT	0.00848	16198369	NA	NA	NA
16148513	G	A	0.693648	0.999478	0.00739242	0.00187217	7.9e-05	LDL	0.00855	16148744	0.308969	-0.0150209	0.036
16144383	T	C	0.693263	0.999769	0.00737409	0.00187125	8.1e-05	LDL	0.00873	16144614	0.308371	-0.0141896	0.05
16140355	TA	T	0.694824	0.993314	0.0073968	0.00187789	8.2e-05	LDL	0.00876	16140355	NA	NA	NA
16092886	T	C	0.999954	0.681946	-0.0373778	0.00949343	8.2e-05	NRbc	0.00876	16093117	NA	NA	NA
16140596	C	G	0.694801	0.993346	0.00737869	0.0018778	8.5e-05	LDL	0.009047	16140827	NA	NA	NA
16127827	T	G	0.999918	0.818896	-6.9342	1.77356	9.2e-05	ASAT	0.00975	16128058	NA	NA	NA
16180276	G	C	0.999878	0.964003	-0.535214	0.137176	9.6e-05	Lymphocyte	0.010132	16180507	NA	NA	NA
16137886	TA	T	0.694915	0.985919	0.00733905	0.00188221	9.7e-05	LDL	0.010195	NA	NA	NA	NA
16138132	C	G	0.694368	0.986539	0.00730835	0.00188094	1e-04	LDL	0.01038	16138363	0.307968	-0.0145689	0.045
16190155	G	A	0.831724	0.999357	0.00895775	0.002305	1e-04	LDL	0.01038	16190386	0.181119	-0.0159533	0.12
16114130	A	T	0.999768	0.873852	-0.0151968	0.00390876	1e-04	NRbc	0.01038	16114361	0.00029	0.00151755	0.33
16194053	T	C	0.832287	0.992051	0.00897172	0.00231467	0.00011	LDL	0.01137	16194284	0.181108	-0.0159682	0.12
16113648	T	C	0.999765	0.873985	-0.0149707	0.00388311	0.00012	NRbc	0.0122	16113879	0.00029	0.001518	0.33
16114959	A	G	0.999765	0.876956	-0.0149644	0.00388304	0.00012	NRbc	0.0122	16115190	0.00029	0.001518	0.33
16115238	C	A	0.999765	0.872942	-0.0149723	0.00388314	0.00012	NRbc	0.0122	16115469	0.00029	0.001518	0.33
16117494	A	G	0.999763	0.872287	-0.014939	0.00388138	0.00012	NRbc	0.0122	16117725	0.00029	0.001518	0.33
16129179	G	A	0.999777	0.981892	-3.78738	0.988378	0.00013	ASAT	0.01311	16129410	NA	NA	NA
16199989	G	C	0.832182	0.958866	0.00897948	0.00235159	0.00013	LDL	0.01311	16200220	NA	NA	NA
16180293	A	C	0.999814	0.910378	-4.26776	1.12139	0.00014	ASAT	0.014	16180524	NA	NA	NA
16180848	G	A	0.999814	0.910378	-4.26776	1.12139	0.00014	ASAT	0.014	16181079	NA	NA	NA
16115564	T	G	0.898166	0.998253	0.0107943	0.00285017	0.00015	LDL	0.01495	16115795	0.106776	-0.0158877	0.15
16100996	G	A	0.999917	0.885613	-0.651402	0.173256	0.00017	Lymphocyte	0.016878	16101227	NA	NA	NA
16181203	A	C	0.999862	0.881908	-0.50443	0.134581	0.00018	Lymphocyte	0.01780	16181434	NA	NA	NA
16114475	A	G	0.898743	0.993284	0.0106675	0.0028616	0.00019	LDL	0.01857	16114706	0.106809	-0.015713	0.16
16088790	C	A	0.99976	0.902923	-0.315549	0.0845929	0.00019	Triglycerides	0.01857	16089021	NA	NA	NA
16189297	T	A	0.999952	0.597525	-0.0372767	0.00997575	0.00019	NRbc	0.01857	16189528	NA	NA	NA
16116959	CT	C	0.999847	0.954931	-4.48525	1.2054	2e-04	ASAT	0.0194	16117190	NA	NA	NA
16190563	A	T	0.999661	0.852158	-4.07554	1.09414	2e-04	ALAT	0.0194	16190794	NA	NA	NA
16104400	G	A	0.585228	0.99719	0.0124783	0.00337184	0.00021	Cholesterol	0.020057	16104631	0.400144	-0.014489	0.052
16181161	C	CA	0.993555	0.921303	-0.0799281	0.0215333	0.00021	Cholesterol	0.020057	16181393	NA	NA	NA
16148861	T	C	0.901247	0.990054	0.0107874	0.00290848	0.00021	LDL	0.020057	16149092	0.102021	-0.0405848	0.00037
16184502	C	G	0.836288	0.989498	0.00867518	0.00233831	0.00021	LDL	0.020057	16184733	0.174993	-0.0166528	0.066
16148986	T	G	0.902612	0.992151	0.010816	0.00292547	0.00022	LDL	0.02085	16149217	0.101445	-0.0396427	0.00053
16156731	G	A	0.999261	0.894908	-0.381808	0.103415	0.00022	Eosinophill	0.02085	16156962	0.00021	-0.601675	0.22
16140400	T	G	0.872317	0.985955	0.00955523	0.00259439	0.00023	LDL	0.021477	16140631	0.129308	-0.0137789	0.18
16141385	G	A	0.903186	0.992076	0.0108082	0.00293252	0.00023	LDL	0.021477	16141616	0.10138	-0.0390356	0.00064
16143633	A	G	0.882733	0.989501	0.00989261	0.00268723	0.00023	LDL	0.021477	16143864	0.121464	-0.0120527	0.25
16143666	A	G	0.882736	0.989515	0.00989723	0.00268715	0.00023	LDL	0.021477	16143897	0.121464	-0.0120527	0.25
16180905	G	A	0.995013	0.945382	0.237764	0.0647081	0.00024	TSH	0.022328	16181136	0.0039	-0.194092	0.056
16158632	A	G	0.807661	0.992096	0.00798181	0.00218896	0.00027	LDL	0.025026	16158863	0.198429	-0.02128	0.014
16130495	C	T	0.999591	0.953545	-0.819219	0.22539	0.00028	TSH	0.02586	16130726	0.000149	0.034456	0.95
16198412	C	T	0.852825	0.966145	0.00895585	0.00247069	0.00029	LDL	0.02668	16198643	NA	NA	NA
16158510	A	G	0.807272	0.992197	0.00790375	0.00218686	3e-04	LDL	0.0274025	16158741	0.199212	-0.0204293	0.018
16163033	C	T	0.999932	0.915312	-1.19873	0.331939	3e-04	Eosinophill	0.0274025	16163264	NA	NA	NA
16155909	C	A	0.807277	0.988688	0.00790927	0.00219115	0.00031	LDL	0.028213	16156141	NA	NA	NA
16093773	A	G	0.999871	0.910013	-2.16263	0.602729	0.00033	Albumin	0.02960	16094004	NA	NA	NA
16156573	T	C	0.80731	0.988594	0.00786368	0.00219112	0.00033	LDL	0.02960	16156804	0.199245	-0.020676	0.017
16083433	A	G	0.999957	0.773939	-0.917626	0.255295	0.00033	Lymphocyte	0.02960	16083664	NA	NA	NA
16119820	C	T	0.992648	0.958196	-0.800943	0.223299	0.00033	ALAT	0.02960	16120051	0.00427111	-0.596717	0.61
16177050	T	C	0.999915	0.759637	-6.55972	1.83582	0.00035	ASAT	0.0313	16177281	NA	NA	NA
16147118	T	C	0.902303	0.992898	0.0104248	0.00292116	0.00036	LDL	0.03195	16147349	0.101401	-0.0395901	0.00054
16100809	T	A	0.999944	0.80992	-1.43248	0.40157	0.00036	Eosinophill	0.03195	16101040	NA	NA	NA
16178069	A	G	0.999844	0.957329	-4.22669	1.18689	0.00037	ASAT	0.03261	16178300	NA	NA	NA
16193075	C	T	0.999917	0.871169	-1.12065	0.314512	0.00037	Eosinophill	0.03261	16193306	NA	NA	NA
16158043	G	A	0.807569	0.992949	0.00777366	0.0021877	0.00038	LDL	0.03337	16158274	0.199201	-0.0203239	0.019
16159490	T	A	0.807487	0.993113	0.00776285	0.00218737	0.00039	LDL	0.034015	16159721	0.19918	-0.0203512	0.019
16161194	A	G	0.80683	0.998998	0.00773049	0.00218058	0.00039	LDL	0.034015	16161425	0.199397	-0.0203302	0.019
16160515	G	A	0.807632	0.993111	0.00771414	0.00218811	0.00042	LDL	0.036379	16160746	0.199245	-0.0198348	0.022
16133843	C	T	0.999836	0.922749	-0.0150619	0.00427318	0.00042	NRbc	0.036379	16134074	NA	NA	NA
16160886	T	C	0.807462	0.993319	0.0076905	0.00218737	0.00044	LDL	0.03785	16161117	0.199365	-0.020108	0.02
16198138	C	T	0.999879	0.888131	-6.29655	1.79202	0.00044	ALAT	0.03785	16198369	NA	NA	NA
16145242	C	T	0.903396	0.994036	0.0103067	0.0029351	0.00045	LDL	0.03858	16145473	0.100607	-0.0409694	0.00035
16111427	C	T	0.900284	0.977134	0.0101544	0.00289994	0.00046	LDL	0.03917	16111658	0.106036	-0.0170318	0.13
16157030	C	T	0.807826	0.988613	0.00768035	0.00219345	0.00046	LDL	0.03917	16157261	0.199169	-0.020564	0.017
16104384	G	T	0.909997	0.969997	0.0106213	0.00304718	0.00049	LDL	0.041582	16104615	0.0894769	-0.0177279	0.14
16137049	T	C	0.999931	0.812804	-0.675493	0.194207	5e-04	Lymphocyte	0.042288	16137280	NA	NA	NA
16155620	G	A	0.999952	0.610335	-0.0359825	0.010348	0.00051	NRbc	0.042989	16155851	NA	NA	NA
16184307	G	C	0.963876	0.971096	0.0309823	0.00894119	0.00053	Cholesterol	0.04438	16184538	0.0443637	-0.031279	0.08
16101299	C	G	0.999779	0.834681	-0.393108	0.113372	0.00053	Lymphocyte	0.04438	16101530	NA	NA	NA
16152825	G	A	0.999944	0.568854	-0.0310857	0.0089888	0.00054	NRbc	0.045064	16153056	NA	NA	NA
16138471	C	T	0.999946	0.598092	-0.030975	0.00895882	0.00055	NRbc	0.045747	16138702	NA	NA	NA
16108923	G	C	0.992585	0.961025	-0.766791	0.222329	0.00056	ALAT	0.04642	16109154	0.00427111	-0.822334	0.48
16108415	A	G	0.999782	0.844852	-0.391901	0.113886	0.00058	Lymphocyte	0.04792	16108646	NA	NA	NA
BP; Genomic position, A1FREQ; Allele frequency allele 1, UKB; UK Biobank, SE; standard error, p-val; p-value, FDR; false disovery rate, MAF; minor allele frequency HUNT; The Trøndelag Health Study, TSH; Thyroid-Stimulating Hormone, ASAT; aspartate aminotransferase, NRbc; Nucleated Red Blood cells, LDL; Low density lipoprotein cholesterol, ALAT; alanine aminotransferase.
TSH; Thyroid-Stimulating Hormone, ASAT; aspartate aminotransferase,NRbc; Nucleated Red Blood cells, ALAT; alanine aminotransferase, LDL; low density lipoprotein cholesterol,

## Sheet: Sheet5
Supplemenatary Table 5: Top ten most significant SNPs associated with lipid traits in HUNT (LDL cholesterol, cholesterol, and triglycerides), validated agaings CAD, MI, and hypertension in UKB
BP (37)	ALLELE1	ALLELE0	A1FREQ HUNT	Beta HUNT	SE HUNT	pval HUNT	phenotype	BP (38)	A1FREQ UKB	Beta CAD UKB	pval CAD UKB	Beta MI UKB	pval MI UKB	Beta HT UKB	pval HT UKB
16126934	A	G	0.317097	-0.0355559	0.00742392	1.7e-06	LDL	16126703	0.3015	-0.009642186	0.4375	-0.00122219	0.96093	-0.001990638	0.79607
16124560	C	T	0.32047	-0.0347969	0.00740225	2.6e-06	LDL	16124329	0.30437	-0.01174489	0.34338	0.0006791182	0.9782	-0.002634932	0.73176
16131156	C	T	0.318544	-0.0348184	0.00741656	2.7e-06	LDL	16130925	0.30176	-0.00930451	0.4537	-0.0001779111	0.9943	-0.002265813	0.7686
16114223	T	G	0.313202	-0.0313571	0.00743603	2.5e-05	LDL	16113992	0.28645	-0.01095058	0.3863	0.004445054	0.8611	-0.00317664	0.6852
16127407	T	C	0.22255	-0.0345108	0.00833717	3.5e-05	LDL	16127176	0.202	-0.002198148	0.8767	-0.01732031	0.543	0.002760616	0.7535
16128965	G	C	0.222615	-0.0344414	0.00833539	3.6e-05	LDL	16128734	0.2018	-0.002185724	0.8776	-0.01676857	0.5565	0.003116112	0.7234
16120819	T	C	0.222702	-0.0324882	0.00833072	9.6e-05	LDL	16120588	0.204	-0.00433205	0.7601	-0.02053224	0.4714	0.0007717658	0.9301
16122360	G	C	0.225335	-0.0321674	0.00829906	0.00011	LDL	16122129	0.2046	-0.005317013	0.7067	-0.01695359	0.5505	0.001117944	0.8985
16133820	G	C	0.218524	-0.0306254	0.00833343	0.00024	LDL	16133589	0.20378	-0.01539586	0.27505	0.01224426	0.6657	-0.01471524	0.0926
16107867	C	A	0.521162	-0.0251554	0.00692245	0.00028	LDL	16107636	0.4852	-0.0211881	0.06369	-0.02179387	0.3423	-0.01654872	0.01951
16126934	A	G	0.317095	-0.0373686	0.0078694	2e-06	Cholesterol	16126703	0.3015	-0.009642186	0.43751	-0.00122219	0.9609	-0.001990638	0.79607
16124560	C	T	0.320467	-0.0365931	0.00784643	3.1e-06	Cholesterol	16124329	0.30437	-0.01174489	0.34338	0.0006791182	0.9782	-0.002634932	0.7318
16131156	C	T	0.318542	-0.0366405	0.0078616	3.2e-06	Cholesterol	16130925	0.30176	-0.00930451	0.4537	-0.0001779111	0.9943	-0.002265813	0.7686
16114223	T	G	0.3132	-0.0320406	0.00788224	4.8e-05	Cholesterol	16113992	0.28645	-0.01095058	0.3863	0.004445054	0.86107	-0.00317664	0.6852
16127407	T	C	0.222547	-0.0348879	0.00883734	7.9e-05	Cholesterol	16127176	0.20201	-0.002198148	0.8767	-0.01732031	0.54297	0.002760616	0.7535
16128965	G	C	0.222613	-0.034708	0.00883545	8.6e-05	Cholesterol	16128734	0.20182	-0.002185724	0.8776	-0.01676857	0.55653	0.003116112	0.7234
16120819	T	C	0.2227	-0.0330555	0.00883051	0.00018	Cholesterol	16120588	0.20418	-0.00433205	0.7601	-0.02053224	0.4714	0.0007717658	0.9301
16122360	G	C	0.225332	-0.0326828	0.00879695	2e-04	Cholesterol	16122129	0.2046	-0.005317013	0.7067	-0.01695359	0.55047	0.001117944	0.8985
16133820	G	C	0.218533	-0.0315932	0.00883341	0.00035	Cholesterol	16133589	0.20378	-0.01539586	0.27505	0.01224426	0.66568	-0.01471524	0.0926
16145473	T	C	0.100607	-0.0418733	0.0121565	0.00057	Cholesterol	16145242	0.09686	0.00945287	0.6241	0.03588869	0.3543	-0.01099921	0.358
16080960	G	A	0.0002607	0.779499	0.18504	2.5e-05	Triglycerides	16080729	0.000167	0.2000365	0.67212	-1.044594	0.2754	0.4125312	0.1551
16088155	G	A	0.0006517	0.447866	0.117245	0.00013	Triglycerides	16087924	0.001556	0.004851641	0.9741	0.3009011	0.31526	-0.1007453	0.2768
16196187	C	G	0.0122746	-0.0765374	0.0269811	0.0046	Triglycerides	16195956	0.00886	-0.08075202	0.1863	-0.2447302	0.045677	-0.001653638	0.96524
16107756	A	G	0.0412123	-0.0406811	0.015014	0.0067	Triglycerides	16107525	0.0404	0.01203984	0.68117	0.05894317	0.31598	-0.0335392	0.0657
16151309	A	G	0.000293	0.469623	0.174117	0.007	Triglycerides	16151078	NA	NA	NA	NA	NA	NA	NA
16161654	T	A	0.009559	0.0789235	0.0307482	0.01	Triglycerides	16161423	0.0072	-0.06191447	0.36004	-0.09679202	0.4761	0.007123988	0.8656
16137186	C	T	0.0010102	-0.234246	0.0938659	0.013	Triglycerides	16136955	0.00104	-0.140544	0.47289	0.07953194	0.8401	-0.03123969	0.7952
16198268	T	C	0.0158266	-0.0593046	0.0238899	0.013	Triglycerides	16198037	0.01625	0.007172224	0.87281	0.0105849	0.9062	-0.005337878	0.8481
16193171	T	C	0.0159244	-0.0568327	0.023805	0.017	Triglycerides	16192940	0.01578	0.005979316	0.89545	-0.007478072	0.93468	0.001630108	0.95407
16154981	G	A	0.00386704	0.108897	0.0476063	0.022	Triglycerides	16154750	0.003412	-0.1027313	0.3179	-0.1627205	0.4269	0.01183306	0.8535
BP; Base pair, A1freq; Allele frequency, HUNT; The Trøndelag Health Study, SE; standard error, pval; p-value, UKB; UK Biobank, CAD; coronary artery disease, MI; myocardial infarction, HT; hypertension

## Sheet: Sheet6
Supplemenatary Table 6: The eight significant SNPs associated with TSH in HUNT validated against TSH, hyperthyroidism, and hypothyroidism in UKB, and with hyperthyroidism and hypothyroidism in HUNT
Phenotype	rsID	BP (37)	BP(38)	A1freq HUNT	beta TSH HUNT	pval TSH HUNT	A1freq UKB	beta TSH UKB	pval TSH UKB	pval hyper UKB	pval hypo UKB	Beta Hyper HUNT	pval Hyper HUNT	Beta Hypo HUNT	pval Hypo HUNT
TSH	rs185184376	16134185	16133954	0.012205000	0.364720	3.6e-10	0.992377	0.0376527	0.47	0.01717146	0.52860441	0.0127189	0.9393553	0.210025	0.05694966
TSH	rs543344218	16140740	16140509	0.001377110	1.004790	3.8e-09	0.999172	0.198439	0.27	0.6451278	0.3738986	-0.5347	0.2836301	-0.0828744	0.8021938
TSH	rs867419575	16098554	16098323	0.000337528	2.043420	4.1e-09	0.999562	0.204302	0.35	0.09726331	0.39464992	-1.01306	0.3562906	0.0486447	0.9444083
TSH	rs141520926	16092423	16092192	0.018645000	0.252216	8.2e-08	0.988012	0.00487333	0.91	0.0585326	0.7530795	0.168457	0.2232747	0.230827	0.01161876
TSH	rs143656216	16142121	16141890	0.026327200	0.172025	1.5e-05	0.980132	-0.0119883	0.71	0.09012436	0.81447563	0.125662	0.2676797	0.178442	0.01743406
TSH	rs77832768	16146435	16146204	0.026570200	0.164883	3.1e-05	0.976033	-0.0166631	0.57	0.2465841	0.5999064	0.132102	0.2415919	0.1611	0.03094509
TSH	rs114175769	16198304	16198073	0.026313700	0.161967	4.7e-05	0.979793	-0.00737461	0.82	0.3693509	0.8767556	0.117539	0.2989071	0.17727	0.01793937
TSH	rs79974720	16188165	16187934	0.026516200	0.161269	4.8e-05	0.979857	-0.00844887	0.79	0.3739003	0.8843867	0.0995952	0.3743037	0.165909	0.02545595
BP; Base pair, A1freq; Allele frequency, HUNT; The Trøndelag Health Study, pval; p-value, UKB; UK Biobank, TSH, thyroid-stimulating hormone, hyper; hyperthyroidism, hypo; hypothyroidism

## Sheet: Sheet7
Supplementary table 7: Functional annotation of SNPs significantly associated with risk factor in HUNT after correction for multiple testing
SNP (GRCh37)	rsID	Associated phenotype(s)	MYLIP function (dbSNP)	Previously reported associations	TF binding site (JASPAR)	TF binding site (ReMap)	Regulatory element (ORegAnno)	Regulatory element (GeneHancer)	cCREs (ENCODE)	eQTL (GTEx)
6:16160318_C/T	rs188071035	ALAT	Intron			Yes
6:16145822_C/T	rs571101237	ALAT	Intron		Yes					Yes
6:16099068_A/G	rs1192193990	Albumin			Yes
6:16163086_C/T	rs550554144	Anti-GAD	Non Coding Transcript Variant		Yes
6:16198285_G/C	rs551218596	ASAT			Yes	Yes
6:16112720_G/A	rs187376539	ASAT			Yes
6:16127760_G/A	rs184029155	ASAT	2KB Upstream Variant			Yes
6:16126934_G/A	rs7746081	Cholesterol, LDL cholesterol		Lipid measures, ApoB		Yes
6:16124560_T/C	rs6459450	Cholesterol, LDL cholesterol		Lipid measures, hyperlipidemia medication	Yes	Yes
6:16131156_T/C	rs2235215	Cholesterol, LDL cholesterol	Intron				Transcription factor binding site	Promoter	Proximal enhancer-like signature
6:16114223_G/T	rs1569447	Cholesterol, LDL cholesterol				Yes
6:16125805_G/A	rs112315746	Eosinophils				Yes
6:16196055_T/A	rs184175349	Icterus				Yes
6:16127407_C/T	rs3757354	LDL cholesterol	2KB Upstream Variant	Lipid measures, CAD, hypercholesterolemia, statin repsonse, early-onset-preeclampsia, longevity, aerobic fitness	Yes	Yes			Distal enhancer-like signature
6:16128965_C/G	rs760633	LDL cholesterol	2KB Upstream Variant	High LD with SNP associated with lipid measures			Transcription factor binding site	Promoter
6:16181354_G/A	rs539745773	Lymphocytes			Yes	Yes
6:16175295_A/G	rs2038037	MCH		Lipid measures, LDLR degradation	Yes	Yes
6:16187335_A/C	rs6459451	MCH		Lymohoma	Yes	Yes
6:16189921_C/A	rs9477052	MCH				Yes
6:16192759_C/G	rs9464871	MCH			Yes
6:16197144_G/A	rs2142673	MCH				Yes
6:16187522_C/G	rs6459452	MCH			Yes	Yes	Transcription factor binding site		Distal enhancer-like signature
6:16187699_T/A	rs6905841	MCH			Yes	Yes			Distal enhancer-like signature
6:16187971_C/T	rs35284971	MCH				Yes
6:16192937_A/G	rs1815305	MCH			Yes
6:16186956_G/C	rs9383119	MCH			Yes
6:16192025_T/C	rs9383120	MCH			Yes	Yes	Transcription factor binding site
6:16193010_T/C	rs1815304	MCH			Yes
6:16193281_G/A	rs7760370	MCH
6:16193416_G/T	rs7760540	MCH		PHF-tau	Yes	Yes
6:16197492_A/G	rs2142670	MCH			Yes	Yes
6:16198293_C/T	rs2327953	MCH			Yes	Yes
6:16195308_T/C	rs2327951	MCH		Lipid measures, LRLR degradation	Yes	Yes
6:16196759_G/A	rs9370870	MCH			Yes	Yes
6:16196894_G/A	rs9370871	MCH			Yes	Yes
6:16196985_T/A	rs9349998	MCH			Yes	Yes
6:16197194_G/A	rs2142672	MCH		Lipid measures, hypercholesterolemia, LXRα activation, burden of heavy metals	Yes	Yes
6:16197349_A/G	rs2142671	MCH			Yes	Yes
6:16198121_C/A	rs2327952	MCH			Yes
6:16198247_A/G	rs4363041	MCH				Yes
6:16161654_A/T	rs150753501	NRbc	Non Coding Transcript Variant		Yes	Yes			Proximal enhancer-like signature
6:16161052_T/C	rs999924307	Peth	Intron			Yes
6:16190070_G/A	rs149755813	Thyroxine (T4)				Yes
6:16143649_G/A	rs187088250	TNI	Intron		Yes	Yes
6:16080960_A/G	rs577223324	Triglycerides			Yes	Yes
6:16134185_C/T	rs185184376	TSH	Intron		Yes	Yes	Transcription factor binding site
6:16140740_A/G	rs543344218	TSH	Intron		Yes	Yes
6:16098554_C/A	rs867419575	TSH			Yes	Yes
6:16092423_C/T	rs141520926	TSH			Yes	Yes
6:16142121_T/C	rs143656216	TSH	Intron		Yes
6:16146435_C/T	rs77832768	TSH	Intron		Yes	Yes
6:16198304_C/T	rs114175769	TSH				Yes
6:16188165_A/G	rs79974720	TSH				Yes
6:16140296_A/G	rs183409081	Vitamin K	Intron			Yes
SNP; single-nucleotide polymorphism, GRCh37; Genome Reference Consortium Human Build 37, TF; transcription factor, cCRE; Candidate Cis-Regulatory Elements, eQTL; Expression quantitative trait locus
Anti-GAD; anti-glutamic acid decarboxylase, TSH; Thyroid-Stimulating Hormone, ASAT; aspartate aminotransferase, TNI; Troponin I, MCH; Mean cell hemoglobin, NRbc; Nucleated Red Blood cells, Peth; Phosphatidyl ethanol, ALAT; alanine aminotransferase.

## Sheet: Sheet8
Supplementary table 8: Functional annotation of SNPs significantly associated with risk factor in UKB after correction for multiple testing
BP (GRCh38)	rsID	Associated phenotype(s)	MYLIP function (dbSNP)	Previously reported associations	TF binding site (JASPAR)	TF binding site (ReMap)	Regulatory element (ORegAnno)	Regulatory element (GeneHancer)	cCREs (ENCODE)	eQTLs (GTEx)
16080.1	rs893036253	ALAT			Yes	Yes
16146684	rs199758517	ALAT, ASAT	Missense Variant		Yes
16158813	rs928816024	ALAT	Intron			Yes
16116959	rs1759236763	ALAT, ASAT				Yes
16185635	rs759606553	ALAT, ASAT			Yes	Yes
16080729	rs577223324	ALAT, ASAT			Yes	Yes
16178069	rs780462611	ALAT, ASAT			Yes
16080368	rs973362166	ALAT, ASAT			Yes
16152257	rs989958734	ALAT, ASAT	Non Coding Transcript Variant			Yes
16190563	rs752570334	ALAT			Yes	Yes			Distal enhancer-like signature
16119820	rs141839480	ALAT			Yes	Yes
16198138	rs902158884	ALAT, ASAT			Yes	Yes
16108923	rs116834327	ALAT				Yes	Transcription factor binding site
16093773	rs1040179945	Albumin			Yes
16179697	rs757022930	ASAT				Yes		Enhancer
16161395	rs141515115	ASAT	Non Coding Transcript Variant		Yes				Proximal enhancer-like signature	Yes
16161883	rs961333658	ASAT	Non Coding Transcript Variant		Yes
16186092	rs1378365875	ASAT				Yes
16127827	rs770376515	ASAT	2KB Upstream Variant			Yes
16129179	rs531490250	ASAT	Non Coding Transcript Variant		Yes		Transcription factor binding site	Promoter		Yes
16180293	rs985256348	ASAT				Yes	Transcription factor binding site	Enhancer	Distal enhancer-like signature
16180848	rs924298508	ASAT			Yes	Yes		Enhancer
16177050	rs1760170611	ASAT
16124329	rs6459450	Cholesterol, LDL		Lipid measures, LDLR degradation	Yes	Yes
16130925	rs2235215	Cholesterol, LDL	Intron	Lipid measures, sphingomyelins levels		Yes		Promoter
16126703	rs7746081	Cholesterol, LDL		Lipid measures, ApoB		Yes
16134016	rs6920309	Cholesterol, LDL	Intron	Lipid measures, ApoB	Yes	Yes	Transcription factor binding site			Yes
16131066	rs2066905	Cholesterol, LDL	Intron	Lipid measures, statin use		Yes	Transcription factor binding site		Proximal enhancer-like signature
16114017	rs1569446	Cholesterol, LDL		Lipid measures	Yes	Yes
16128841	rs760632	Cholesterol, LDL	2KB Upstream Variant	Lipid measures			Transcription factor binding site	Promoter	Promoter-like signature
16126442	rs7741879	Cholesterol, LDL		Lipid measures, ApoB	Yes	Yes
16113090	rs7776156	Cholesterol, LDL		Lipid measures		Yes
16113502	rs2480	Cholesterol, LDL		Lipid mesaures, LDLR degradation		Yes
16113791	rs12205047	Cholesterol, LDL			Yes	Yes
16113992	rs1569447	Cholesterol, LDL				Yes
16145094	rs9370867	Cholesterol, LDL	Missense Variant	Lipid measures, LDLR degradation
16122129	rs7759222	Cholesterol, LDL			Yes	Yes
16128734	rs760633	Cholesterol, LDL	2KB Upstream Variant	High LD with SNP associated with lipid measures			Transcription factor binding site	Promoter
16120588	rs9464867	Cholesterol, LDL			Yes	Yes
16127176	rs3757354	Cholesterol, LDL	2KB Upstream Variant	Lipid measures, CAD, hypercholesterolemia, statin repsonse, early-onset-preeclampsia, longevity, aerobic fitness	Yes	Yes			Distal enhancer-like signature
16106837	rs9383117	Cholesterol, LDL
16109955	rs6913929	Cholesterol, LDL			Yes	Yes	Transcription factor binding site		Distal enhancer-like signature
16108932	rs2294261	Cholesterol, LDL		Lipid measures, LDLR degradation	Yes	Yes	Transcription factor binding site
16107636	rs2294266	Cholesterol, LDL		Lipid measures	Yes	Yes			Promoter-like signature
16108200	rs2294264	Cholesterol, LDL			Yes	Yes	Transcription factor binding site
16133589	rs2237107	Cholesterol, LDL	Intron	Hypercholesterolemia		Yes	Transcription factor binding site
16175064	rs2038037	Cholesterol, LDL		Lipid measures, LDLR degradation	Yes	Yes
16134371	rs9349995	Cholesterol, LDL	Intron		Yes	Yes
16198280	rs4460203	Cholesterol, LDL			Yes	Yes			Distal enhancer-like signature
16142128	rs7763395	Cholesterol, LDL	Intron	Lipid measures		Yes
16141371	rs7738525	Cholesterol, LDL	Intron			Yes
16148513	rs4716050	Cholesterol, LDL	Intron			Yes
16148512	rs4716049	Cholesterol, LDL				Yes
16144383	rs2056937	Cholesterol, LDL	Intron	Lipid measures		Yes
16140355	NA	Cholesterol, LDL			Yes
16186725	rs9383119	Cholesterol, LDL			Yes
16140596	rs4716048	Cholesterol, LDL	Intron			Yes
16187104	rs6459451	Cholesterol, LDL			Yes	Yes
16187291	rs6459452	Cholesterol, LDL			Yes	Yes	Transcription factor binding site		Distal enhancer-like signature
16187468	rs6905841	Cholesterol, LDL			Yes	Yes			Distal enhancer-like signature
16187740	rs35284971	Cholesterol, LDL				Yes
16188940	NA	Cholesterol, LDL
16189690	rs9477052	Cholesterol, LDL				Yes
16191329	NA	Cholesterol, LDL			Yes	Yes
16191794	rs9383120	Cholesterol, LDL			Yes	Yes	Transcription factor binding site
16192528	rs9464871	Cholesterol, LDL			Yes
16196963	rs2142672	Cholesterol, LDL		Lipid measures, hypercholesterolemia, burden of heavy metal	Yes	Yes
16197890	rs2327952	Cholesterol, LDL			Yes
16198016	rs4363041	Cholesterol, LDL				Yes
16198062	rs2327953	Cholesterol, LDL			Yes	Yes
16192.8	rs1815304	Cholesterol, LDL			Yes
16193050	rs7760370	Cholesterol, LDL
16195077	rs2327951	Cholesterol, LDL		Lipid measures, LDLR degradation	Yes	Yes
16196528	rs9370870	Cholesterol, LDL			Yes	Yes
16196754	rs9349998	Cholesterol, LDL			Yes	Yes
16197118	rs2142671	Cholesterol, LDL			Yes	Yes
16197261	rs2142670	Cholesterol, LDL			Yes	Yes
16137886	NA	Cholesterol, LDL
16192706	rs1815305	Cholesterol, LDL			Yes
16193185	rs7760540	Cholesterol, LDL		PFH-tau	Yes	Yes
16196663	rs9370871	Cholesterol, LDL			Yes	Yes
16196913	rs2142673	Cholesterol, LDL				Yes
16138132	rs2142675	Cholesterol, LDL	Intron		Yes	Yes
16198668	rs6459458	Cholesterol, LDL				Yes
16198757	rs6917177	Cholesterol, LDL				Yes
16198429	rs3128120	Cholesterol, LDL				Yes			Distal enhancer-like signature
16198640	rs6459457	Cholesterol, LDL				Yes
16198383	rs6935703	Cholesterol, LDL				Yes			Distal enhancer-like signature
16198418	rs6459455	Cholesterol, LDL			Yes	Yes			Distal enhancer-like signature
16198306	rs6459454	Cholesterol, LDL			Yes	Yes			Distal enhancer-like signature
16180548	rs9370868	Cholesterol, LDL			Yes			Enhancer
16198292	rs6459453	Cholesterol, LDL			Yes	Yes			Distal enhancer-like signature
16148986	rs73377736	Cholesterol, LDL	Intron		Yes	Yes
16110214	rs2327949	Cholesterol, LDL		Lipid measures, LDLR degradation	Yes	Yes			Distal enhancer-like signature
16110535	rs9477045	Cholesterol, LDL			Yes	Yes
16147118	rs2072781	Cholesterol, LDL	Intron	Lipid measures, amyloid beta	Yes	Yes
16141385	rs7756075	Cholesterol, LDL	Intron	Lipid measures		Yes
16148861	rs73377734	Cholesterol, LDL	Intron			Yes
16118637	rs7770780	Cholesterol, LDL			Yes
16145242	rs1060901	Cholesterol, LDL	Synonymous Variant	Lipid mesaures, LDLR degradation		Yes
16189387	rs57977865	Cholesterol, LDL				Yes
16190280	rs9396647	Cholesterol, LDL			Yes	Yes
16119809	rs9464866	Cholesterol			Yes	Yes
16174791	rs13206249	Cholesterol, LDL				Yes			Distal enhancer-like signature
16119.6	rs9477046	Cholesterol				Yes
16185050	rs9358086	Cholesterol, LDL			Yes	Yes	Transcription factor binding site
16108777	rs9477044	Cholesterol				Yes	Transcription factor binding site
16126739	rs72833416	Cholesterol		Lipid measures		Yes
16162277	rs7742144	Cholesterol, LDL	Non Coding Transcript Variant	Lipid measures, PHF-tau		Yes
16160338	rs6939056	Cholesterol, LDL	Intron	Lipid measures	Yes	Yes
16166229	NA	Cholesterol, LDL			Yes	Yes
16104400	rs1474582	Cholesterol			Yes	Yes
16181161	NA	Cholesterol			Yes	Yes
16184307	rs12663143	Cholesterol				Yes	Transcription factor binding site		Distal enhancer-like signature
16181937	rs1156579586	Eosinophill			Yes	Yes	Transcription factor binding site
16082212	rs1043733300	Eosinophill			Yes	Yes
16115951	rs550010284	Eosinophill
16129397	rs774353501	Eosinophill	Synonymous Variant				Transcription factor binding site	Promoter	Proximal enhancer-like signature
16131114	rs569515690	Eosinophill	Intron		Yes	Yes	Transcription factor binding site	Promoter	Proximal enhancer-like signature
16168805	rs1760074709	Eosinophill			Yes	Yes	Transcription factor binding site
16182211	rs922522197	Eosinophill			Yes	Yes
16156731	rs575549181	Eosinophill	Intron		Yes
16163033	rs140479818	Eosinophill	Non Coding Transcript Variant			Yes
16100809	rs896848047	Eosinophill				Yes
16193075	rs767488834	Eosinophill			Yes
16130102	rs909562	LDL	Intron	Hyperlipidemia, CAD, HR response to exercise, body height		Yes	Transcription factor binding site	Promoter	Proximal enhancer-like signature
16127642	rs3757353	LDL	2KB Upstream Variant	Lipid measures	Yes	Yes
16126545	rs35143500	LDL			Yes	Yes
16124862	rs9358085	LDL				Yes			Distal enhancer-like signature
16132178	rs1011616	LDL	Intron	Lipid measures, body height	Yes	Yes		Promoter
16190.2	rs9396646	LDL		Lipid measures, ApoB		Yes			Distal enhancer-like signature
16194053	rs9383122	LDL			Yes	Yes			Distal enhancer-like signature
16199989	rs2235213	LDL				Yes			Distal enhancer-like signature
16115564	rs9370865	LDL				Yes			Distal enhancer-like signature
16114475	rs11969250	LDL			Yes	Yes
16184502	rs34046594	LDL			Yes	Yes	Transcription factor binding site
16140400	rs2282813	LDL	Intron	Lipid measures	Yes	Yes
16143633	rs2072784	LDL	Intron			Yes
16143666	rs2072783	LDL	Intron	Hyperlipidemia, CAD, schizofrenia		Yes
16158632	rs9349997	LDL	Intron	Lipid measures, LDLR degradation		Yes
16198412	rs6913487	LDL			Yes	Yes			Distal enhancer-like signature
16158510	rs9349996	LDL	Intron	High LD with SNP associated with reponse to statin drugs	Yes	Yes
16155909	rs59598616	LDL	Non Coding Transcript Variant	High LD with SNP associated with reponse to statin drugs		Yes
16156573	rs7742617	LDL	Intron	Lipid measures, LDLR degradation, PHF-tau	Yes	Yes
16158043	rs9367897	LDL	Intron	Lipid measures, LDLR degradation, response to statin	Yes	Yes			Distal enhancer-like signature
16159490	rs6918029	LDL	Intron	High LD with SNP associated with reponse to statin drugs		Yes	Transcription factor binding site
16161194	rs6924995	LDL	Non Coding Transcript Variant	Response to statin drug	Yes	Yes
16160515	rs6939285	LDL	Intron	High LD with SNP associated with reponse to statin drugs	Yes	Yes
16160886	rs3886540	LDL	Intron	High LD with SNP associated with reponse to statin drugs	Yes	Yes
16111427	rs56328733	LDL			Yes
16157030	rs6921316	LDL	Intron	Lipid measures, LDLR degradation	Yes
16104384	rs9367894	LDL			Yes	Yes
16143510	rs776863888	Lymphocyte	Intron		Yes	Yes
16168523	rs1319140675	Lymphocyte			Yes	Yes	Transcription factor binding site
16148724	rs1042742977	Lymphocyte	Intron			Yes
16141688	rs139469255	Lymphocyte	Synonymous Variant		Yes	Yes
16168214	rs151332514	Lymphocyte				Yes	Transcription factor binding site	Promoter	Proximal enhancer-like signature
16130.9	rs769548938	Lymphocyte	Intron			Yes	Transcription factor binding site	Promoter	Proximal enhancer-like signature
16164907	rs780509867	Lymphocyte			Yes	Yes	Transcription factor binding site
16110865	rs780929644	Lymphocyte			Yes	Yes
16112241	rs1014191540	Lymphocyte			Yes	Yes
16100430	rs374742151	Lymphocyte			Yes	Yes
16192841	rs774906200	Lymphocyte			Yes
16189953	rs1047975055	Lymphocyte			Yes	Yes			Distal enhancer-like signature
16116348	rs775453792	Lymphocyte			Yes	Yes
16103554	rs906898938	Lymphocyte, NRbc				Yes
16108964	rs143629093	Lymphocyte				Yes	Transcription factor binding site
16145428	rs887796929	Lymphocyte	Intron			Yes
16195089	rs143223996	Lymphocyte				Yes
16142853	rs766191330	Lymphocyte, NRbc	Intron			Yes
16132129	rs987898714	Lymphocyte	Intron			Yes	Transcription factor binding site	Promoter
16089276	rs764513519	Lymphocyte			Yes	Yes
16180672	rs1056630510	Lymphocyte, NRbc				Yes		Enhancer
16180230	rs750039553	Lymphocyte			Yes	Yes	Transcription factor binding site	Enhancer	Distal enhancer-like signature
16180276	rs1197562212	Lymphocyte			Yes	Yes	Transcription factor binding site	Enhancer	Distal enhancer-like signature
16100996	rs533885973	Lymphocyte
16181203	rs191848077	Lymphocyte			Yes	Yes		Enhancer
16083433	rs1482815975	Lymphocyte			Yes	Yes
16137049	rs895642279	Lymphocyte	Intron		Yes	Yes			Distal enhancer-like signature
16101299	rs562765522	Lymphocyte			Yes	Yes
16108415	rs374035652	Lymphocyte				Yes	Transcription factor binding site
16128114	rs575488230	NRbc	2KB Upstream Variant		Yes	Yes			Proximal enhancer-like signature
16180645	rs548574324	NRbc				Yes		Enhancer
16187351	rs1760349242	NRbc				Yes	Transcription factor binding site		Distal enhancer-like signature
16089359	NA	NRbc
16087924	rs150136455	NRbc			Yes	Yes
16107159	rs73724986	NRbc			Yes	Yes
16198413	rs536057546	NRbc			Yes	Yes			Distal enhancer-like signature
16115689	rs559012859	NRbc			Yes	Yes			Distal enhancer-like signature
16183014	rs75729051	NRbc			Yes	Yes	Transcription factor binding site		Distal enhancer-like signature
16196738	rs559758206	NRbc			Yes	Yes
16153193	rs73724999	NRbc	Non Coding Transcript Variant		Yes	Yes
16121354	rs1217331541	NRbc			Yes	Yes
16169003	rs746823635	NRbc			Yes	Yes	Transcription factor binding site		Distal enhancer-like signature
16086512	rs1002932573	NRbc				Yes
16092886	rs749438504	NRbc			Yes	Yes
16114130	rs73724988	NRbc			Yes	Yes
16113648	rs12665164	NRbc			Yes	Yes
16114959	rs12665295	NRbc			Yes	Yes
16115238	rs12663849	NRbc			Yes	Yes
16117494	rs73724989	NRbc			Yes
16189297	rs1036233075	NRbc			Yes	Yes
16133843	rs933533588	NRbc	Intron		Yes	Yes	Transcription factor binding site
16155620	rs949567476	NRbc	Non Coding Transcript Variant		Yes	Yes
16152825	rs1418559598	NRbc	Non Coding Transcript Variant		Yes	Yes
16138471	rs1354463780	NRbc	Intron		Yes	Yes
16088790	rs944610907	Triglycerides				Yes
16180905	rs144751690	TSH				Yes		Enhancer
16130495	rs192181184	TSH	Intron			Yes	Transcription factor binding site	Promoter	Proximal enhancer-like signature
BP; base pair position, GRCh38; Genome Reference Consortium Human Build 38, TF; transcription factor, cCRE; Candidate Cis-Regulatory Elements, eQTL; Expression quantitative trait locus
TSH; Thyroid-Stimulating Hormone, ASAT; aspartate aminotransferase,NRbc; Nucleated Red Blood cells, ALAT; alanine aminotransferase, LDL; low density lipoprotein cholesterol,

## Sheet: Sheet9
Supplementary table 9: Functional annotation of top five most significant SNPs per disease outcomes in HUNT
BP (GRCh37)	rsID	Associated phenotype(s)	MYLIP function (dbSNP)	Previously reported associations	TF binding site (JASPAR)	TF binding site (ReMap)	Regulatory element (ORegAnno)	Regulatory element (GeneHancer)	cCREs (ENCODE)	eQTLs (GTEx)
16198268	rs111611110	AF			Yes	Yes
16180958	rs11965955	AF				Yes		Enhancer
16196187	rs11750953	AF				Yes
16180990	rs11967668	AF, HCM			Yes	Yes		Enhancer
16193171	rs58827116	AF			Yes
16196323	rs762434047	CAD			Yes	Yes
16181681	rs192337533	CAD			Yes	Yes
16197377	rs12191661	CAD, MI				Yes
16144515	rs554970624	CAD	Intron		Yes	Yes
16181676	rs776368746	CAD				Yes
16157864	rs148286630	CVD	Intron		Yes	Yes
16096128	rs72831692	CVD
16167267	rs77491413	CVD			Yes	Yes
16098909	rs62387663	CVD, hypertension				Yes
16124872	rs79599055	CVD, hypertension			Yes	Yes
16090103	rs9477038	DCM				Yes	Transcription factor binding site
16189921	rs9477052	DCM				Yes
16187335	rs6459451	DCM			Yes	Yes
16192759	rs9464871	DCM			Yes
16190511	rs9396647	DCM			Yes	Yes
16177057	rs9477048	HCM			Yes
16110814	rs77391052	HCM				Yes
16171206	rs17581000	HCM			Yes	Yes	Transcription factor binding site
16084400	rs6906774	HCM			Yes
16157108	rs113831599	HF	Intron		Yes	Yes
16159087	rs186506935	HF, Self-rep Hypothyroidism	Intron		Yes	Yes
16079643	rs75914366	HF			Yes	Yes
16146436	rs965141011	HF	Intron		Yes	Yes
16181905	rs535554221	HF			Yes	Yes
16125943	rs115464334	hypertension			Yes	Yes
16086322	rs75912822	hypertension				Yes
16146435	rs77832768	hypertension	Intron		Yes	Yes
16191154	rs201369223	MI			Yes	Yes
16080883	rs4716043	MI				Yes
16082087	rs9367893	MI, stroke			Yes	Yes
16081054	rs6942302	MI			Yes	Yes
16133986	rs2237106	istroke	Intron		Yes	Yes	Transcription factor binding site
16188956	rs76745426	istroke, stroke			Yes	Yes
16120819	rs9464867	istroke			Yes	Yes
16122360	rs7759222	istroke			Yes	Yes
16175230	rs77733575	istroke			Yes	Yes			Distal enhancer-like signature
16093599	rs188623431	nistroke			Yes	Yes
16194284	rs9383122	nistroke			Yes	Yes			Distal enhancer-like signature
16190386	rs9396646	nistroke		Lipid measures, ApoB		Yes			Distal enhancer-like signature
16159	rs111398213	nistroke	Intron		Yes	Yes
16184733	rs34046594	nistroke			Yes	Yes	Transcription factor binding site
16087234	rs2294270	stroke			Yes
16088106	rs6914137	stroke			Yes	Yes
16082947	rs976648	stroke			Yes
16083700	rs145657968	Self rep Hyperthyroidism			Yes	Yes
16198367	rs12193535	Self rep Hyperthyroidism			Yes	Yes
16089.5	rs9477037	Self rep Hyperthyroidism			Yes	Yes
16137589	rs190267377	Self rep Hyperthyroidism	Intron		Yes	Yes	Transcription factor binding site		Distal enhancer-like signature
16107083	rs140188347	Self rep Hyperthyroidism			Yes
16157169	rs577931243	Self-rep Hypothyroidism	Intron		Yes	Yes
16127430	rs144630745	Self-rep Hypothyroidism	2KB Upstream Variant			Yes			Distal enhancer-like signature
16144080	rs34627146	Self-rep Hypothyroidism	Synonymous Variant		Yes	Yes
16181861	rs756452819	Self-rep Hypothyroidism			Yes	Yes
BP; base pair position, GRCh37; Genome Reference Consortium Human Build 37, TF; transcription factor, cCRE; Candidate Cis-Regulatory Elements, eQTL; Expression quantitative trait locus
AF; atrial fibrillation, CAD; coronary artery disease, CVD; cardiovascular disease, DCM; dilated cardiomyopathy, HCM; hypertrophic cardiomyopathy, HF; heart failure, MI; myocardial infarction, istroke; ischemic stroke, nistroke; non-ischemic stroke, self rep; self reported.

## Sheet: Sheet10
Supplementary table 10: Functional annotation of top five most significant SNPs per disease outcomes in UKB
BP (GRCh38)	rsID	Associated phenotype(s)	MYLIP function (dbSNP)	Previously reported associations	TF binding site (JASPAR)	TF binding site (ReMap)	Regulatory element (ORegAnno)	Regulatory element (GeneHancer)	cCREs (ENCODE)	eQTLs (GTEx)
16079279	rs371888721	AF			Yes	Yes
16124996	rs750409846	AF			Yes	Yes			Distal enhancer-like signature
16110997	rs190562172	AF				Yes
16131209	rs766943016	AF	Intron			Yes	Transcription factor binding site	Promoter	Proximal enhancer-like signature
16162890	rs1179321146	AF	Non Coding Transcript Variant		Yes	Yes
16181641	rs957952464	CAD				Yes
16197842	rs139938118	CAD, MI			Yes
16161026	rs189210862	CAD	Intron			Yes				Yes
16121863	rs780762791	CAD			Yes				Distal enhancer-like signature
16160327	rs1759974680	CAD, MI	Intron		Yes	Yes
16100081	rs995697780	CVD			Yes	Yes			Distal enhancer-like signature
16085702	rs138956969	CVD
16105659	rs144631172	CVD			Yes	Yes
16081380	rs1038222746	CVD				Yes
16198253	rs993523136	CVD			Yes	Yes			Distal enhancer-like signature
16172723	rs904384142	DCM			Yes
16136917	rs1211300804	DCM	Intron		Yes	Yes
16163975	rs996583510	DCM	500B Downstream Variant			Yes	Transcription factor binding site
16130014	rs924771514	DCM	Intron			Yes	Transcription factor binding site	Promoter	Proximal enhancer-like signature
16195.3	rs893231855	DCM				Yes
16123791	rs745594955	HCM				Yes
16155467	rs759586807	HCM	Non Coding Transcript Variant
16181674	rs535554221	HCM			Yes	Yes
16103830	rs1007597253	HCM				Yes
16198.1	rs772860028	HCM			Yes	Yes
16197054	rs1223016952	HF, stroke, istroke			Yes	Yes
16197101	rs1344990147	HF, hypothyroidism			Yes	Yes
16106288	rs1217172493	HF, hypothyroidism				Yes
16092323	rs757210525	HF			Yes	Yes
16086819	rs964003395	HF				Yes
16194149	rs760503257	hypertension				Yes
16085621	rs771604013	hypertension
16130818	rs1454447109	hypertension	Intron		Yes	Yes	Transcription factor binding site	Promoter	Proximal enhancer-like signature
16095658	rs562692088	hypertension				Yes
16181179	rs1277481052	hypertension				Yes		Enhancer
16196282	rs1465872898	hyperthyroidism			Yes	Yes
16155628	rs1338670550	hyperthyroidism	Non Coding Transcript Variant		Yes	Yes
16102295	rs1263587742	hyperthyroidism			Yes	Yes
16156877	rs113831599	hyperthyroidism	Intron		Yes	Yes
16154872	rs766541897	hyperthyroidism	Non Coding Transcript Variant			Yes
16085077	rs1005440626	hypothyroidism			Yes	Yes
16146508	rs547796919	hypothyroidism	Intron		Yes	Yes
16164833	rs977479898	hypothyroidism			Yes	Yes
16092115	rs973085432	MI				Yes
16102589	rs540345815	MI			Yes	Yes
16104805	rs550194060	MI			Yes	Yes
16147354	rs907731996	stroke	Intron			Yes				Yes
16132005	rs541565430	stroke				Yes	Transcription factor binding site	Promoter		Yes
16151150	rs559283216	stroke	Non Coding Transcript Variant		Yes	Yes
16086512	rs1002932573	stroke				Yes
16195973	rs1206825940	istroke			Yes	Yes
16186.5	rs936536489	istroke			Yes
16145809	rs984841751	istroke	Intron		Yes	Yes
16140887	NA	istroke
16140735	rs996424586	nistroke	Intron		Yes	Yes			Proximal enhancer-like signature
16184478	rs1427716468	nistroke			Yes	Yes	Transcription factor binding site		Distal enhancer-like signature
16200991	rs778558279	nistroke			Yes	Yes
16127148	rs1476382293	nistroke	2KB Upstream Variant			Yes			Distal enhancer-like signature
16089413	rs748026572	nistroke				Yes	Transcription factor binding site
BP; base pair position, GRCh38; Genome Reference Consortium Human Build 38, TF; transcription factor, cCRE; Candidate Cis-Regulatory Elements, eQTL; Expression quantitative trait locus
AF; atrial fibrillation, CAD; coronary artery disease, CVD; cardiovascular disease, DCM; dilated cardiomyopathy, HCM; hypertrophic cardiomyopathy, HF; heart failure, MI; myocardial infarction, istroke; ischemic stroke, nistroke; non-ischemic stroke.

[truncated: 1 more sheets: Sheet11]
